# Supplementary material
Source: PubMed Central journal article supplement (PMC2523271)

# Progress toward the Total Synthesis of Frondosin C

Xin Li, Robert E. Kyne and Timo V. Ovaska\*

*Connecticut College, Department of Chemistry, 270 Mohegan Avenue, New London, CT 06320, USA*

[tvova@conncoll.edu](mailto:tvova@conncoll.edu)

*Supporting Information:  $^1\text{H}$  NMR and  $^{13}\text{C}$  NMR spectra for compounds 3–9, 15–18, 20–22.*

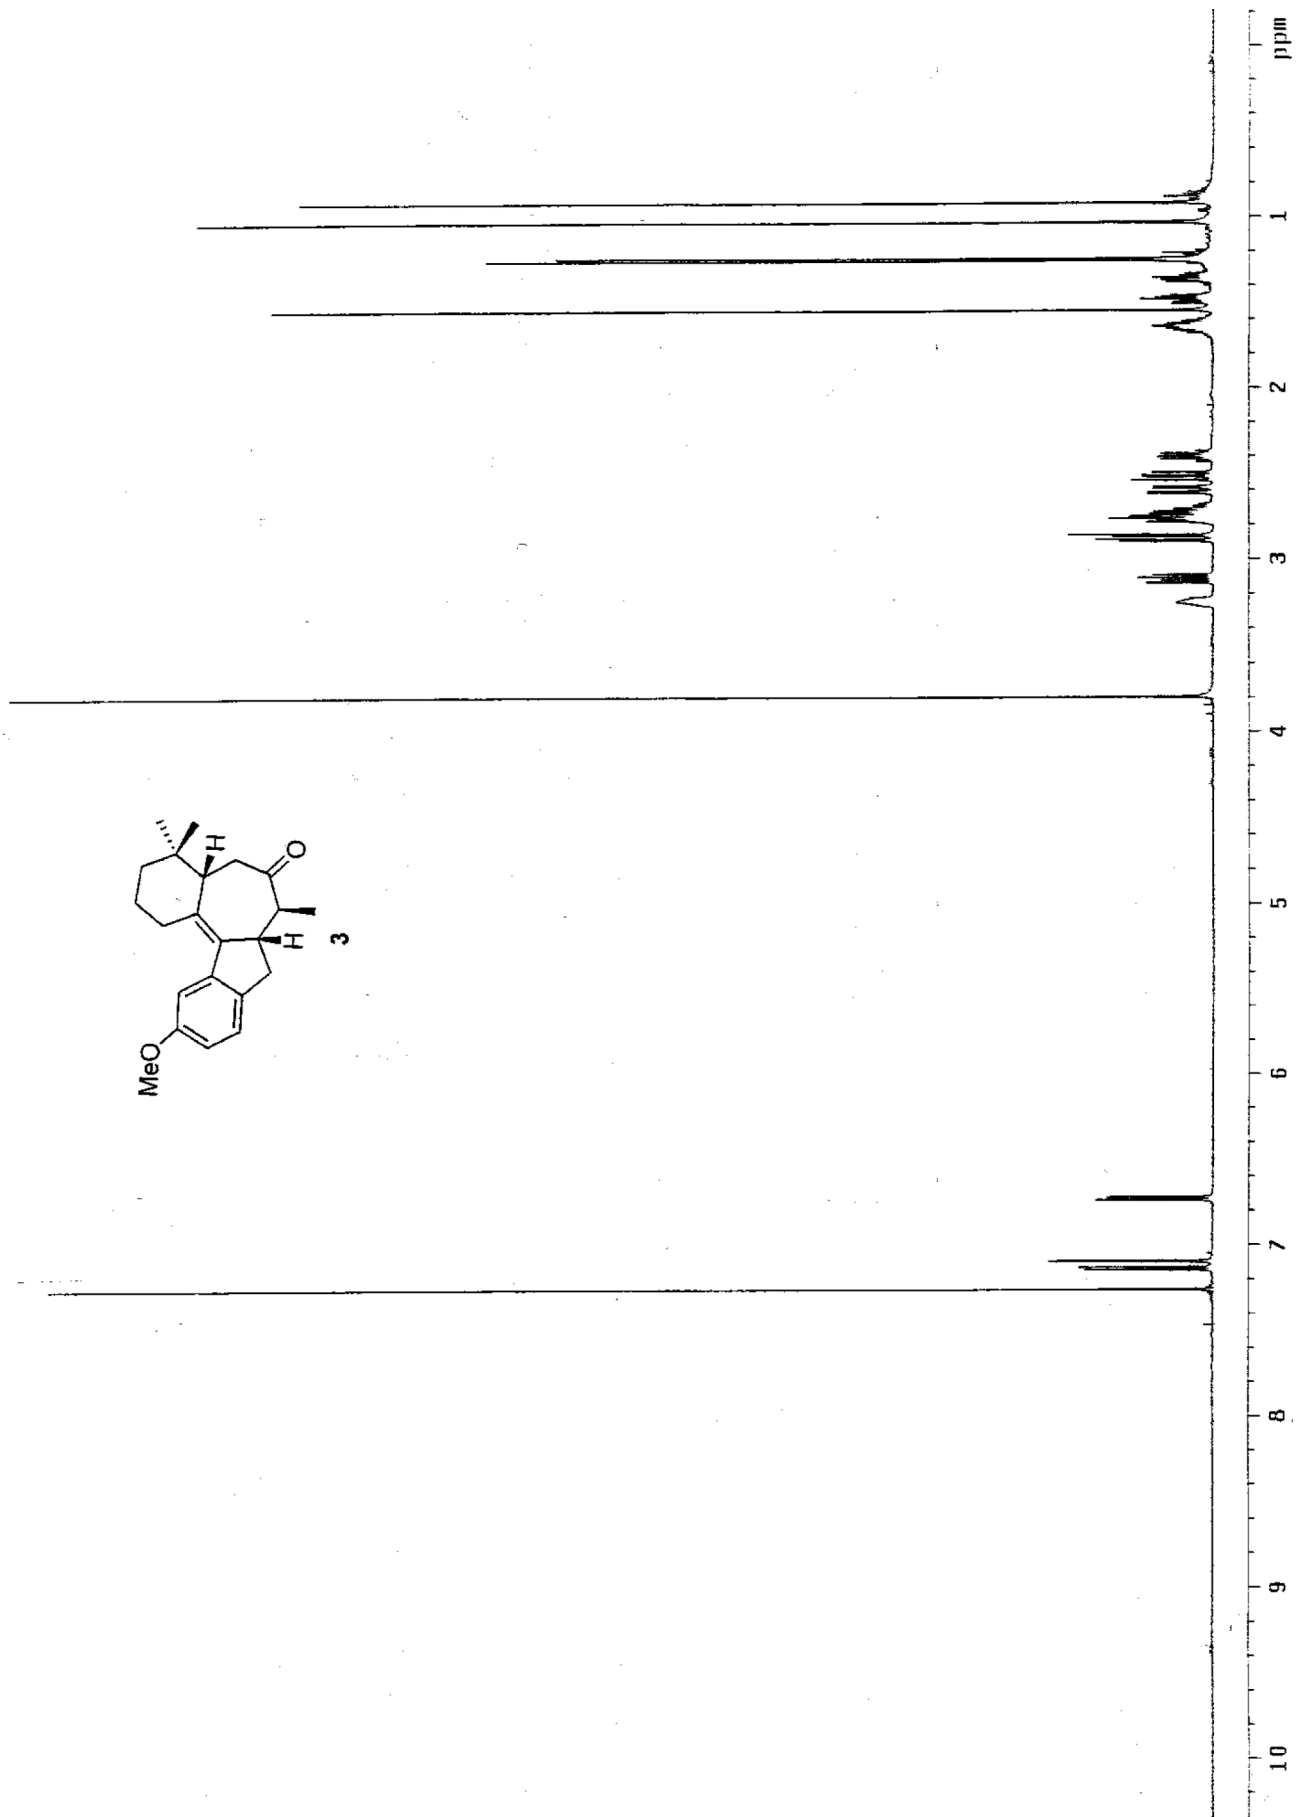

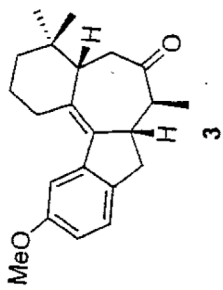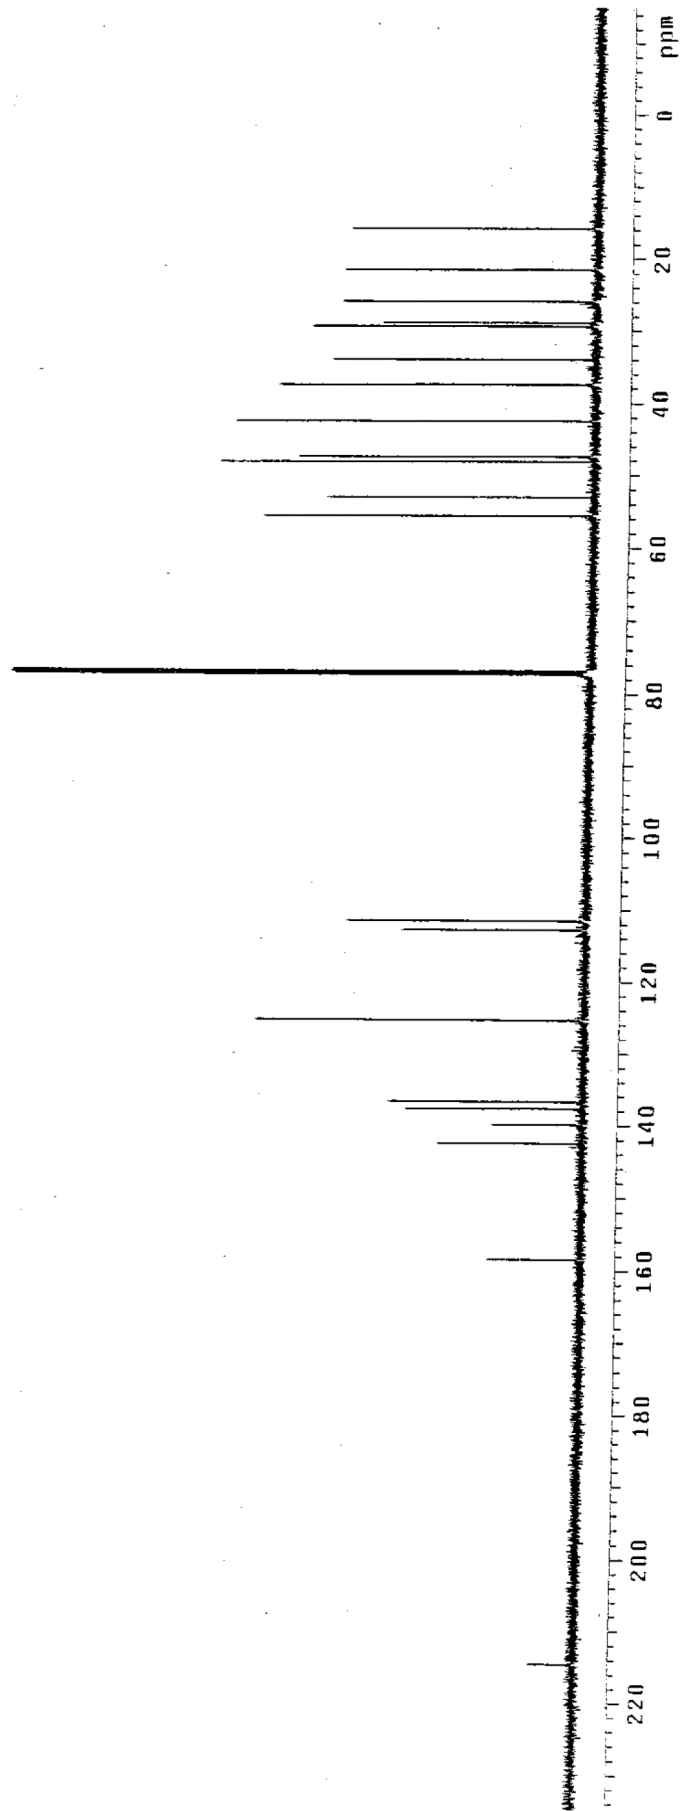

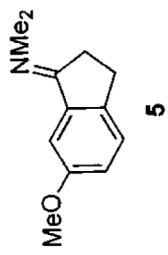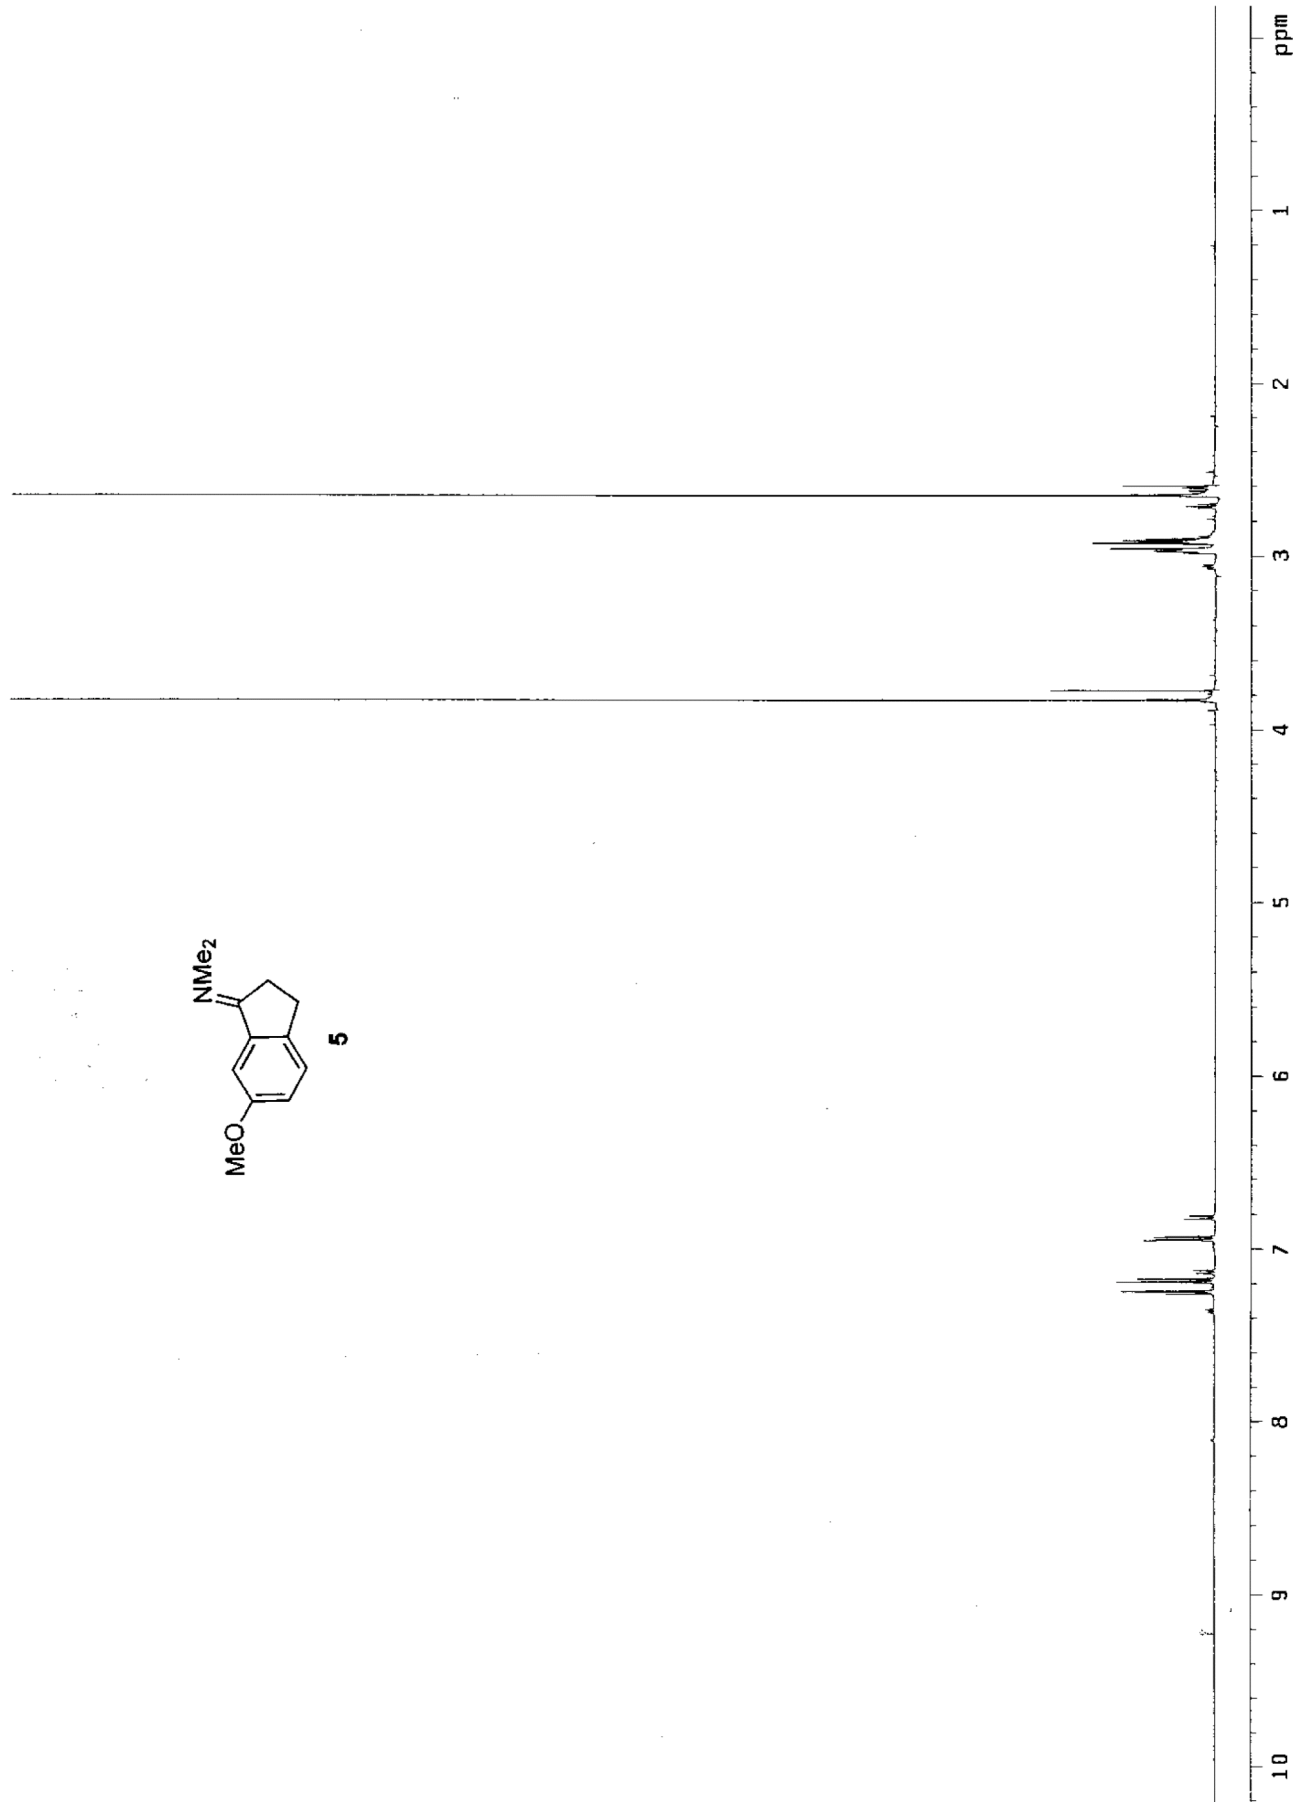

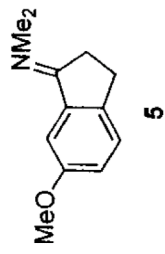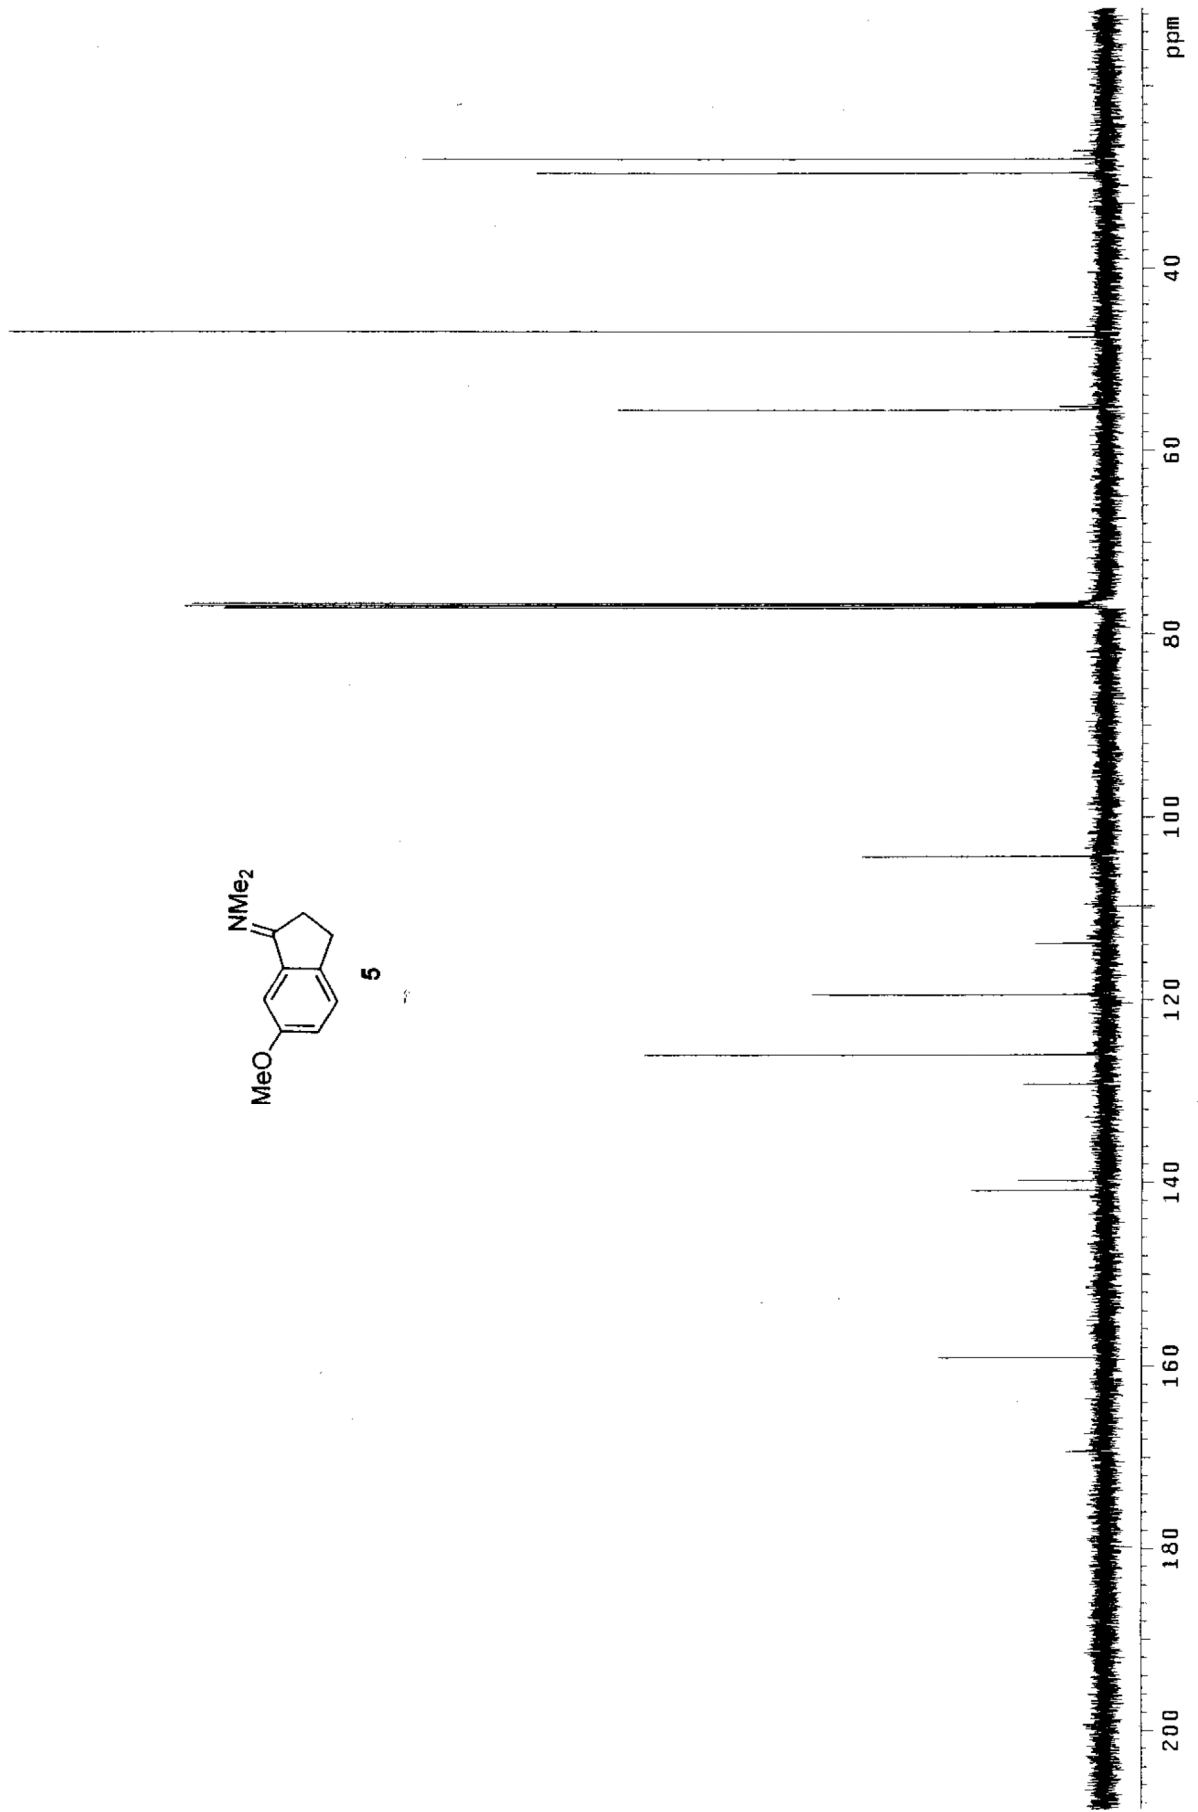

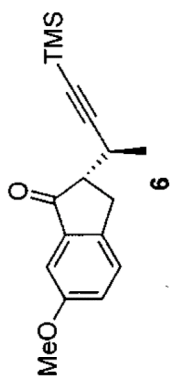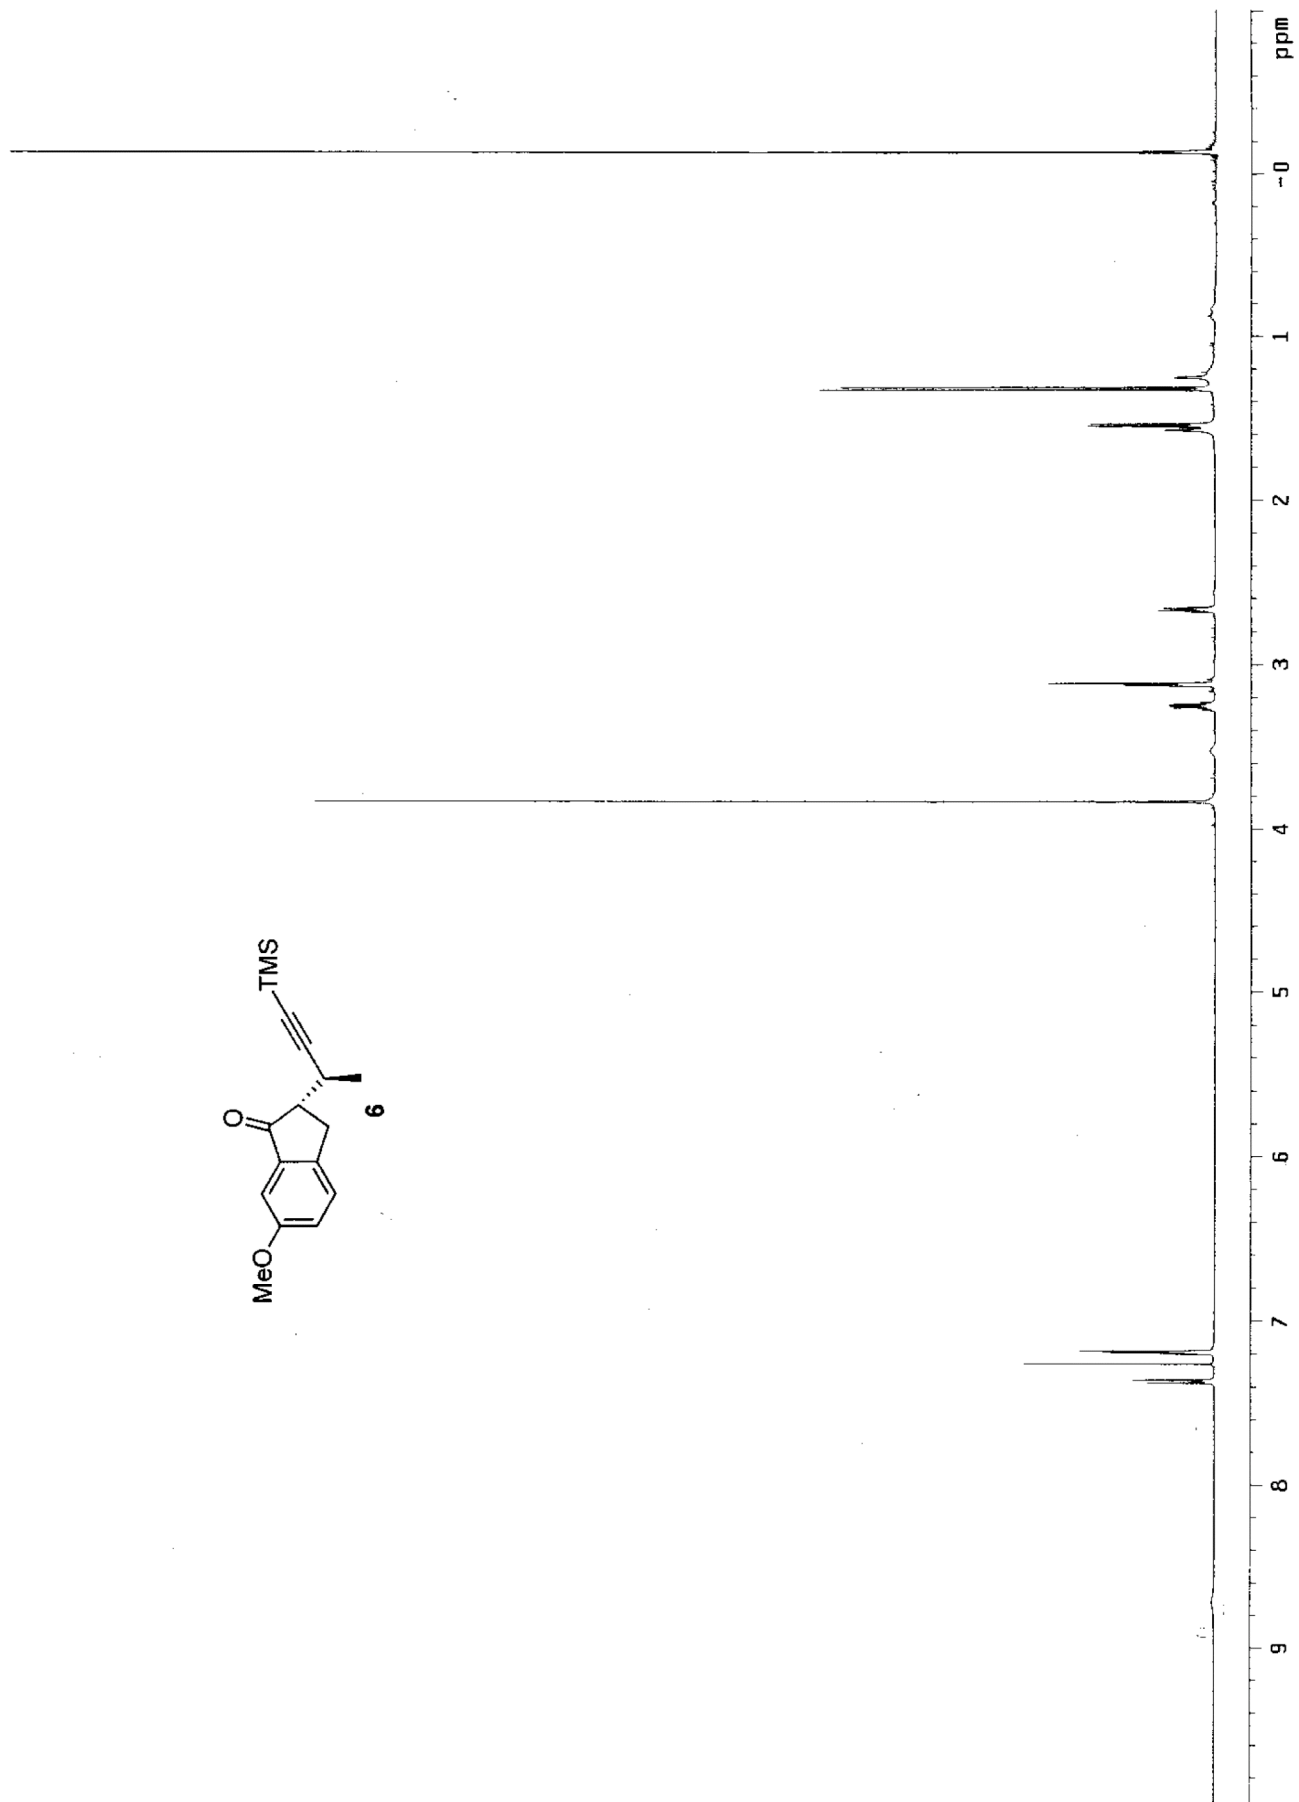

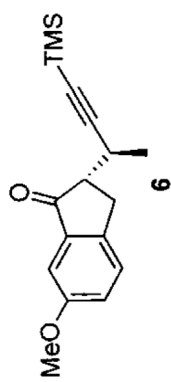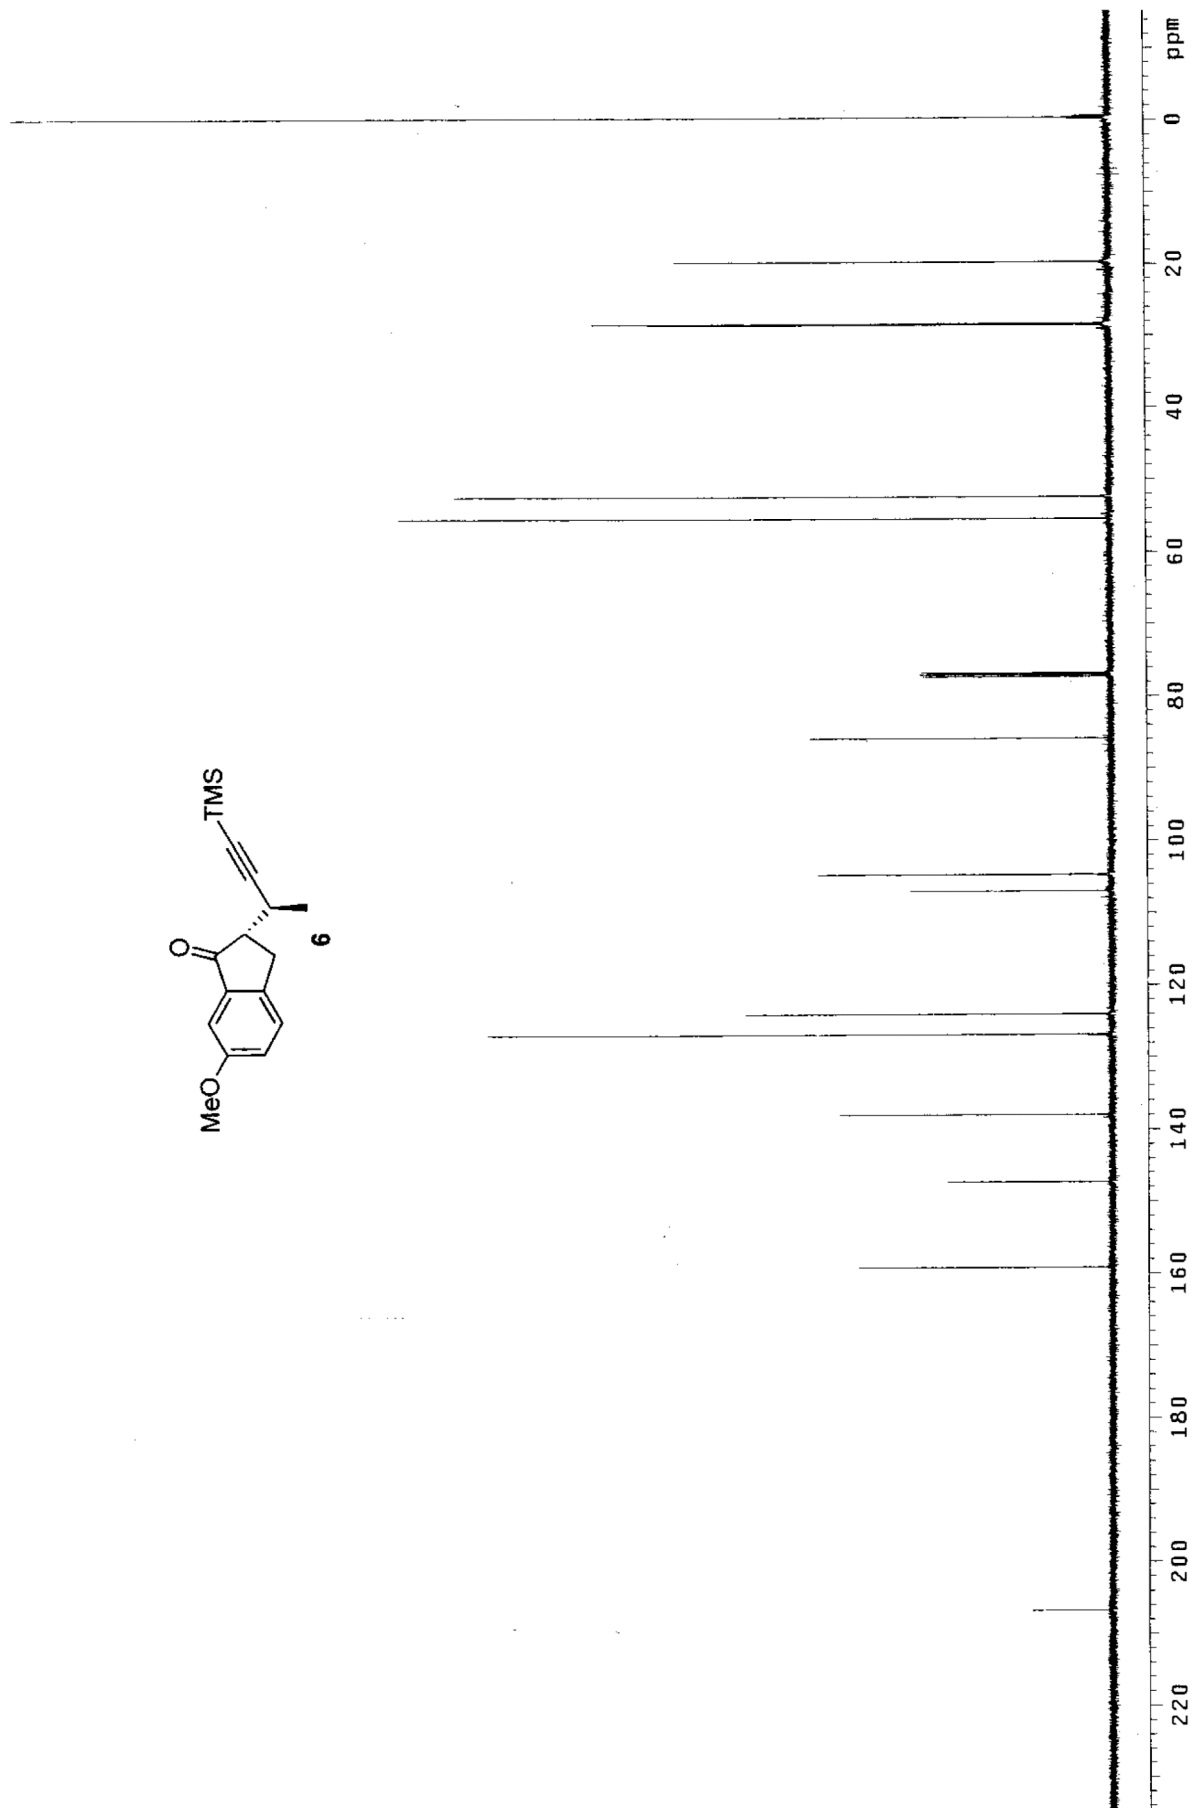

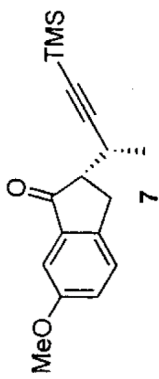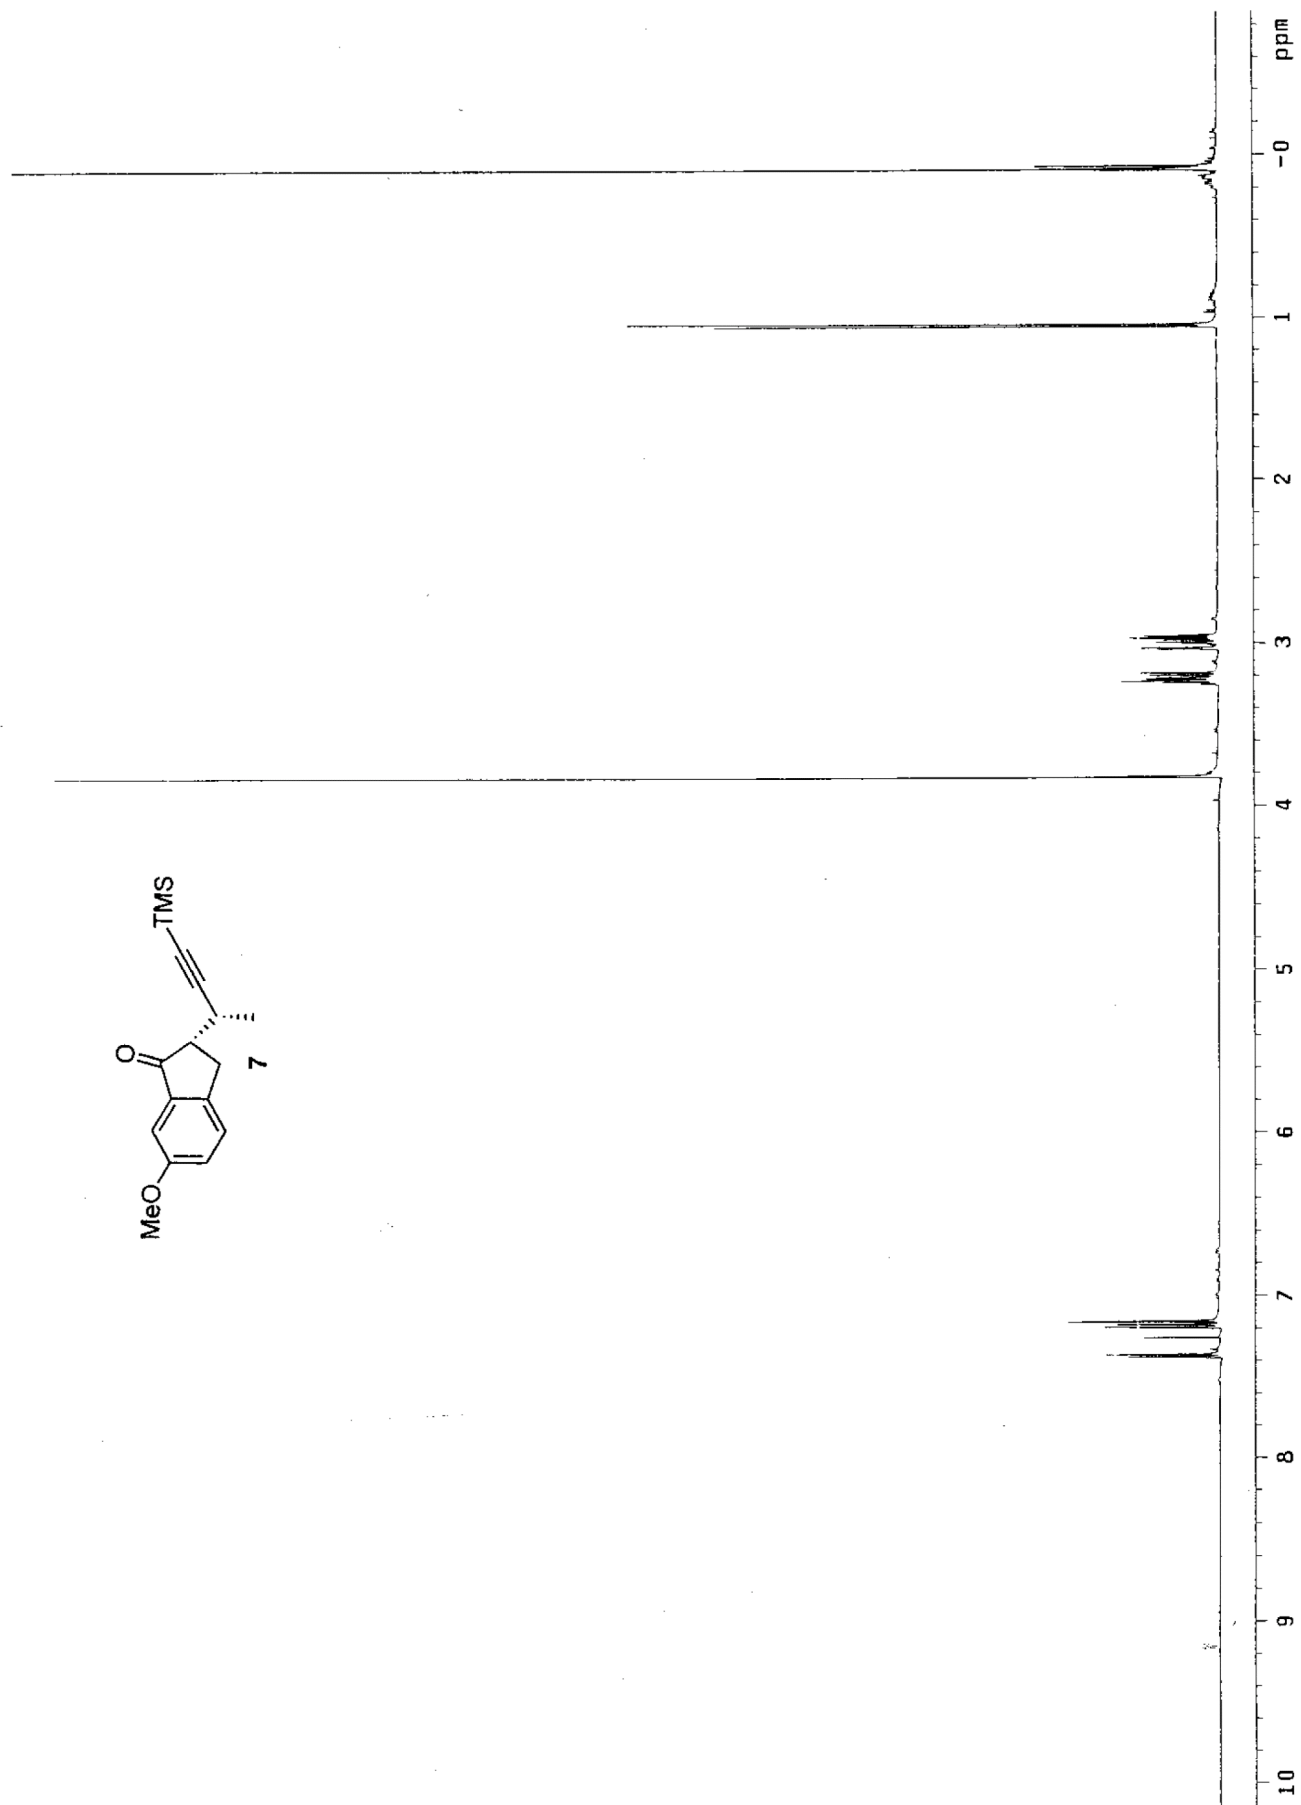



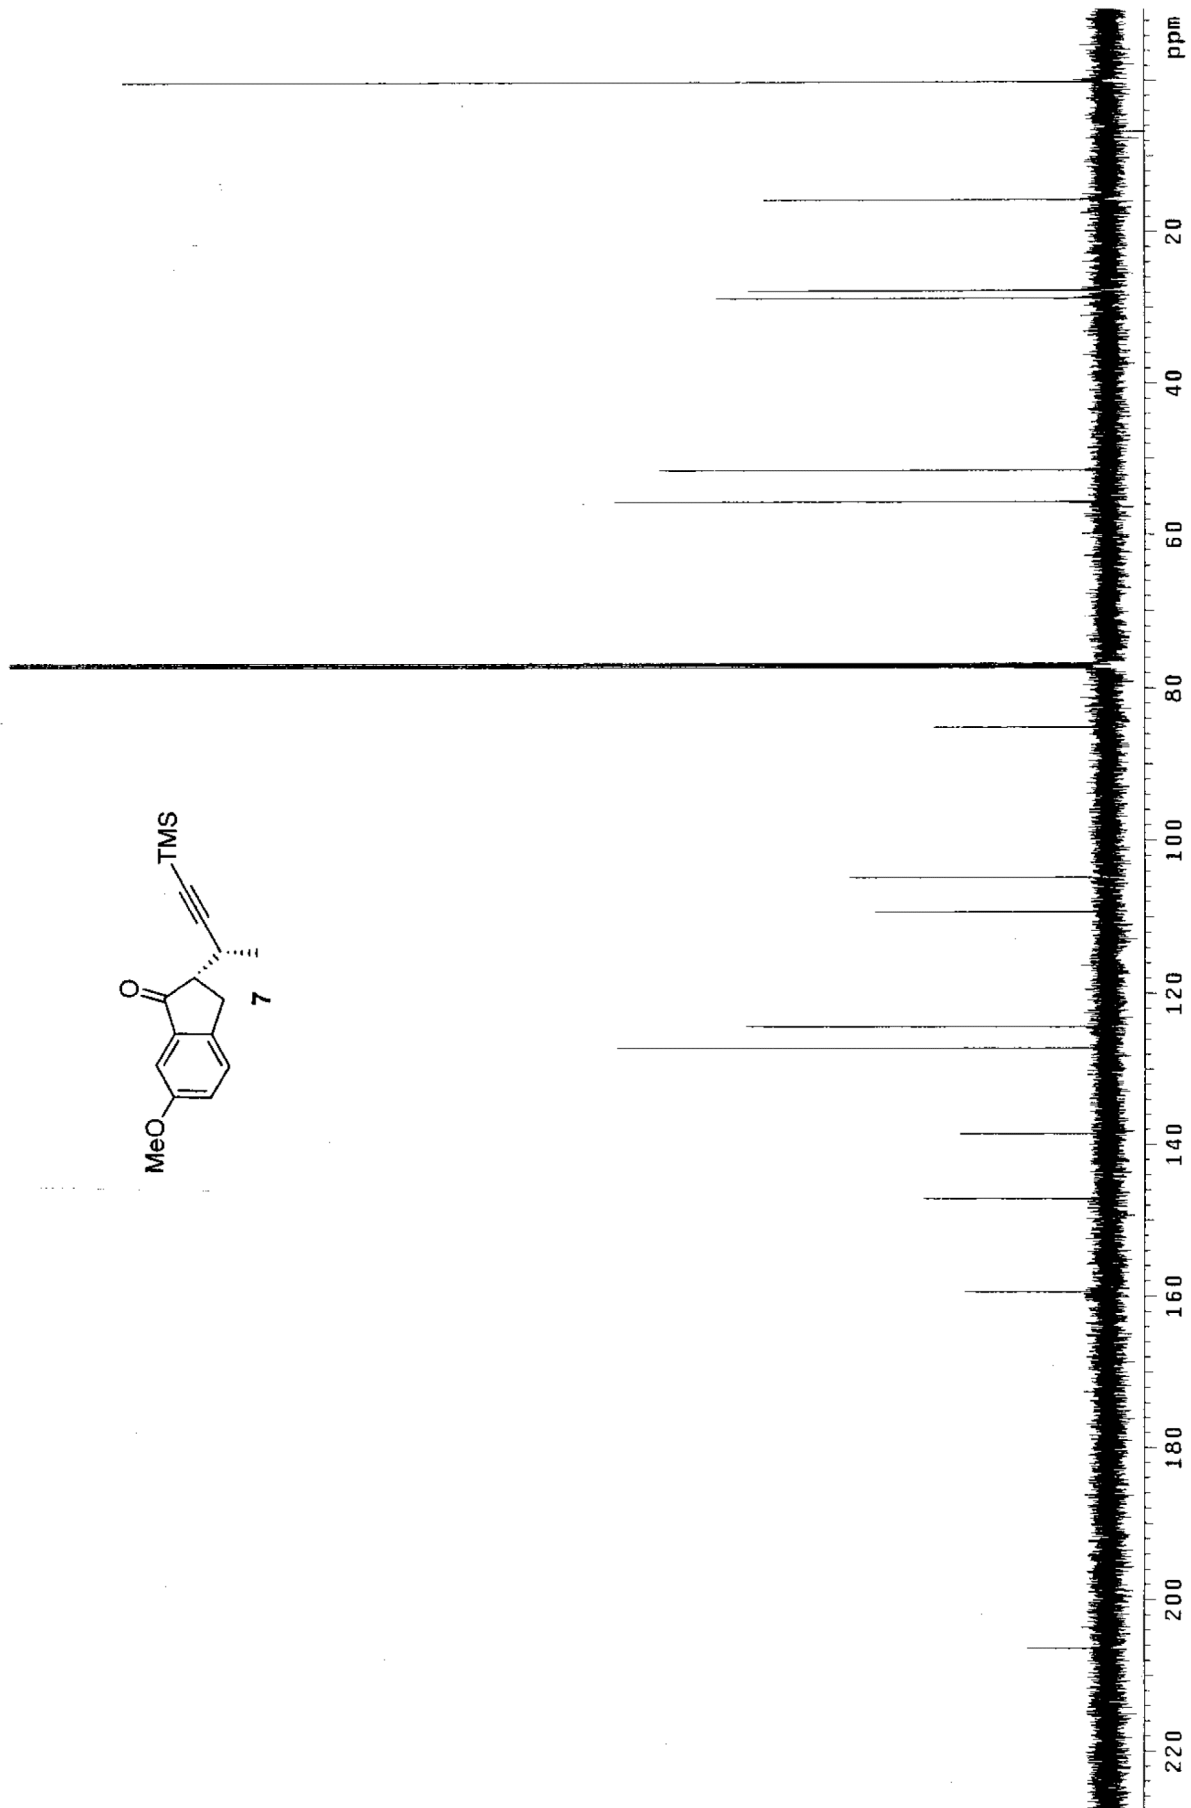

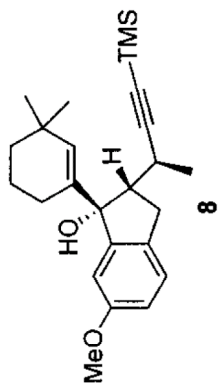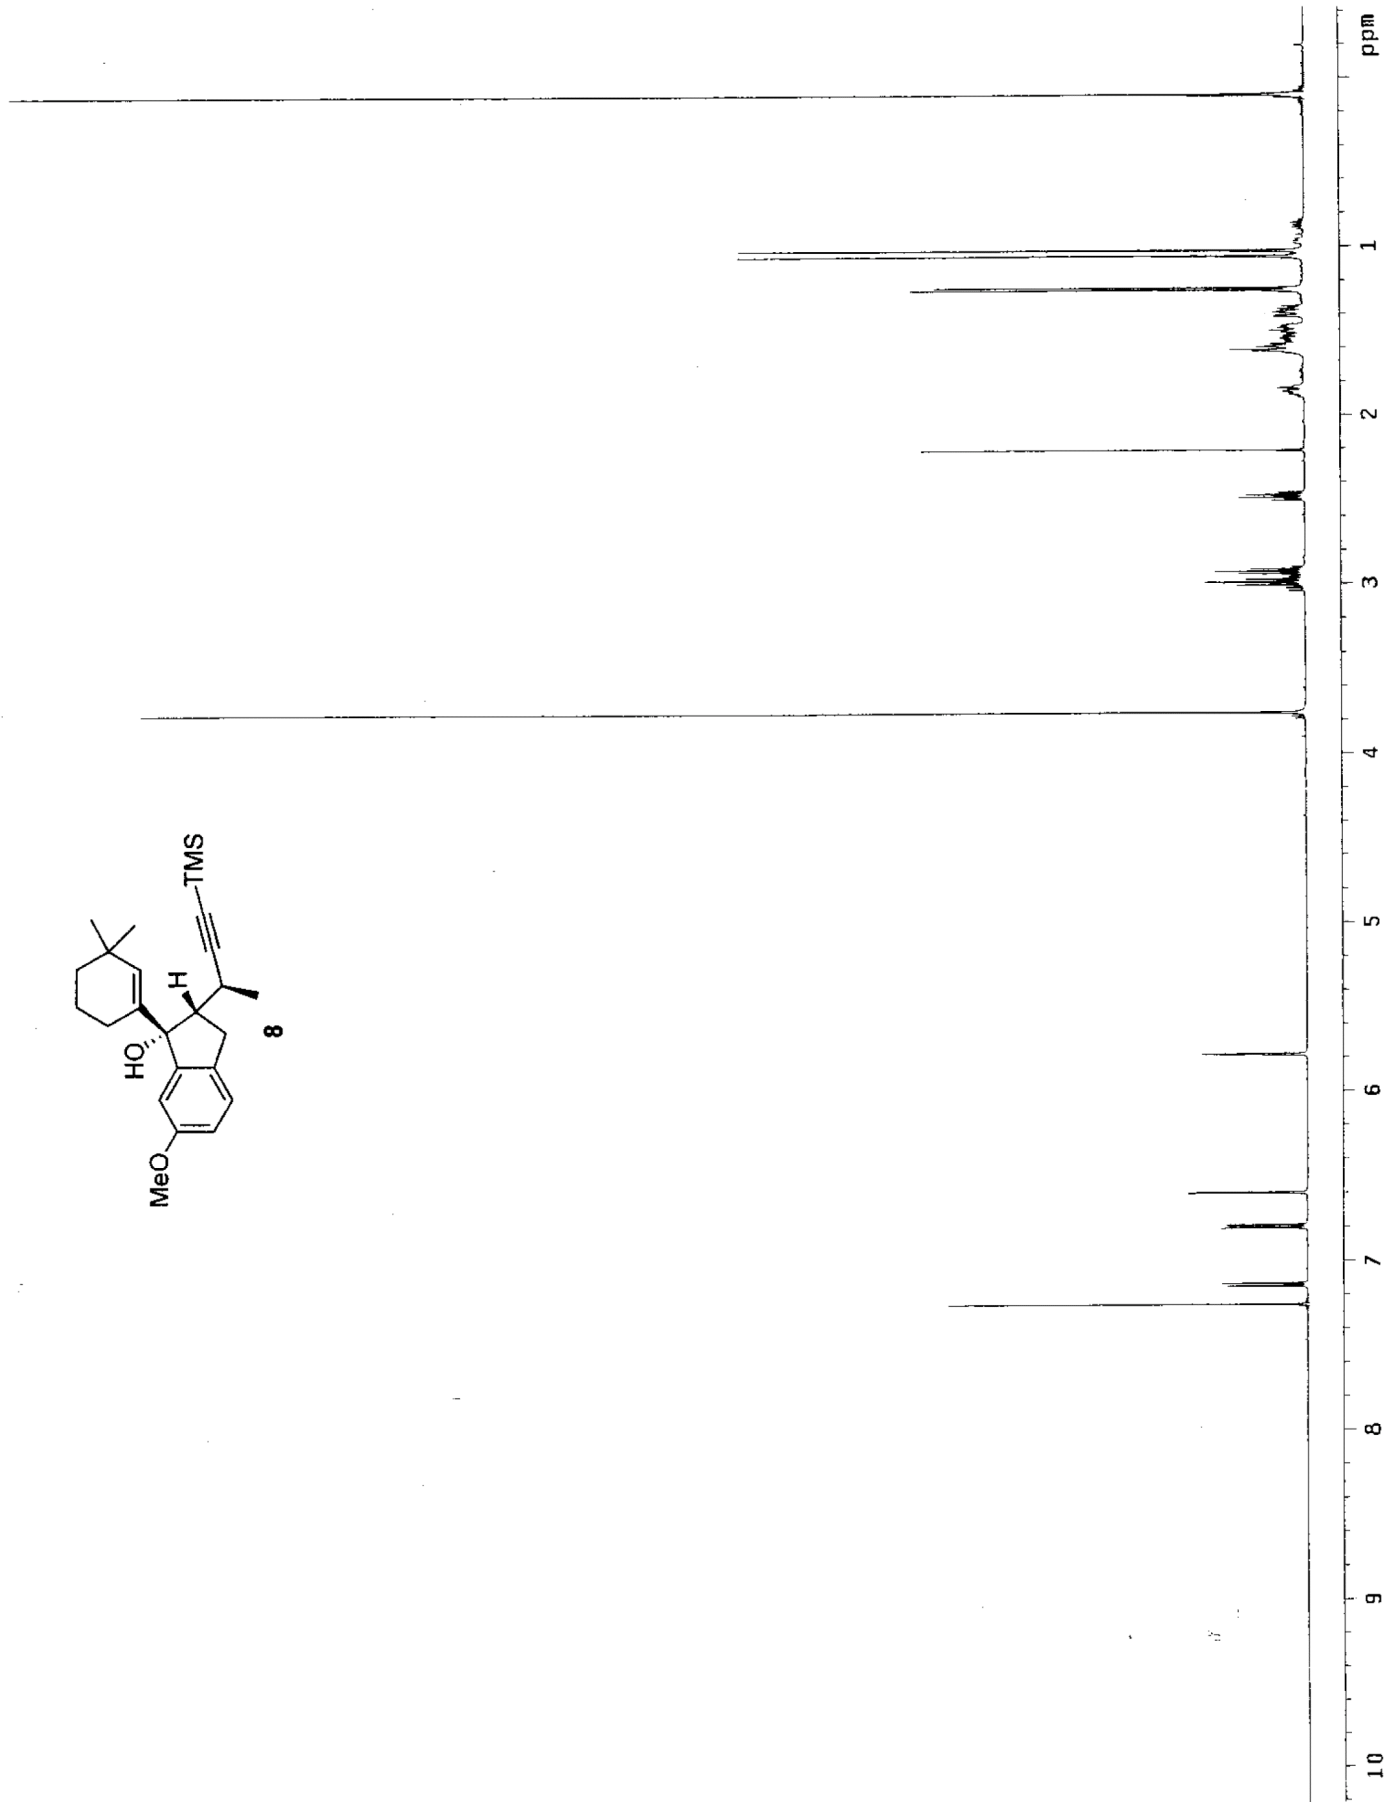

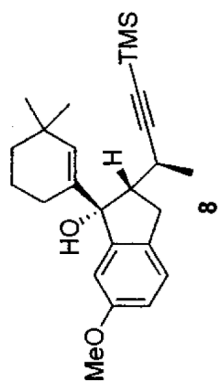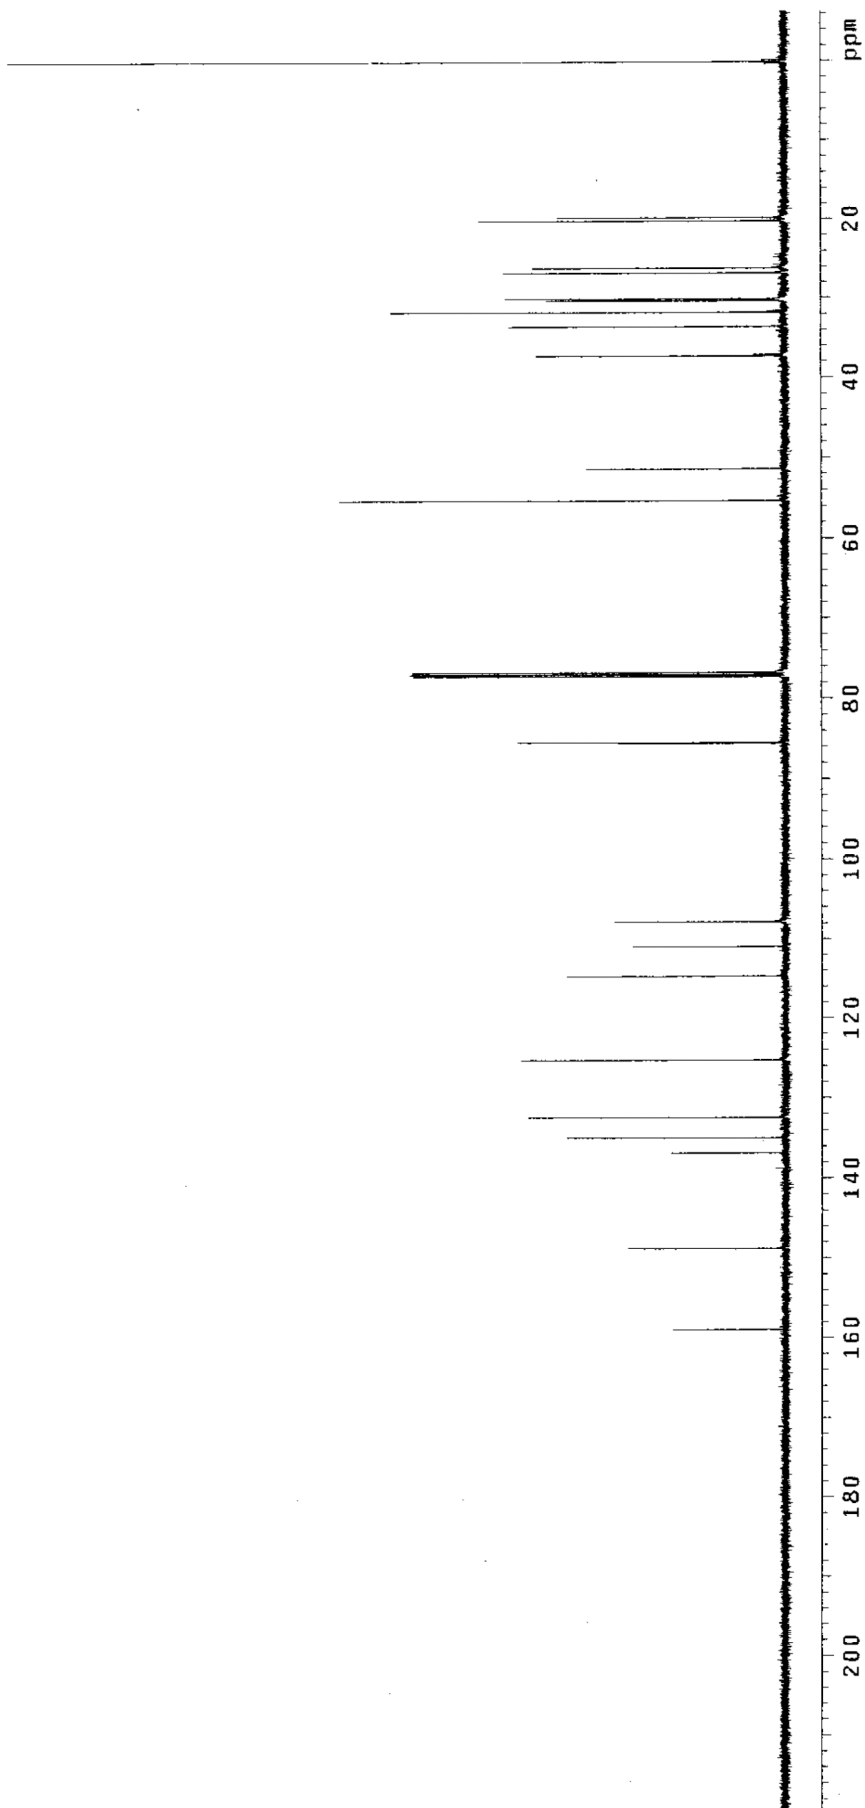

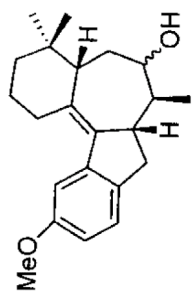

15

less polar

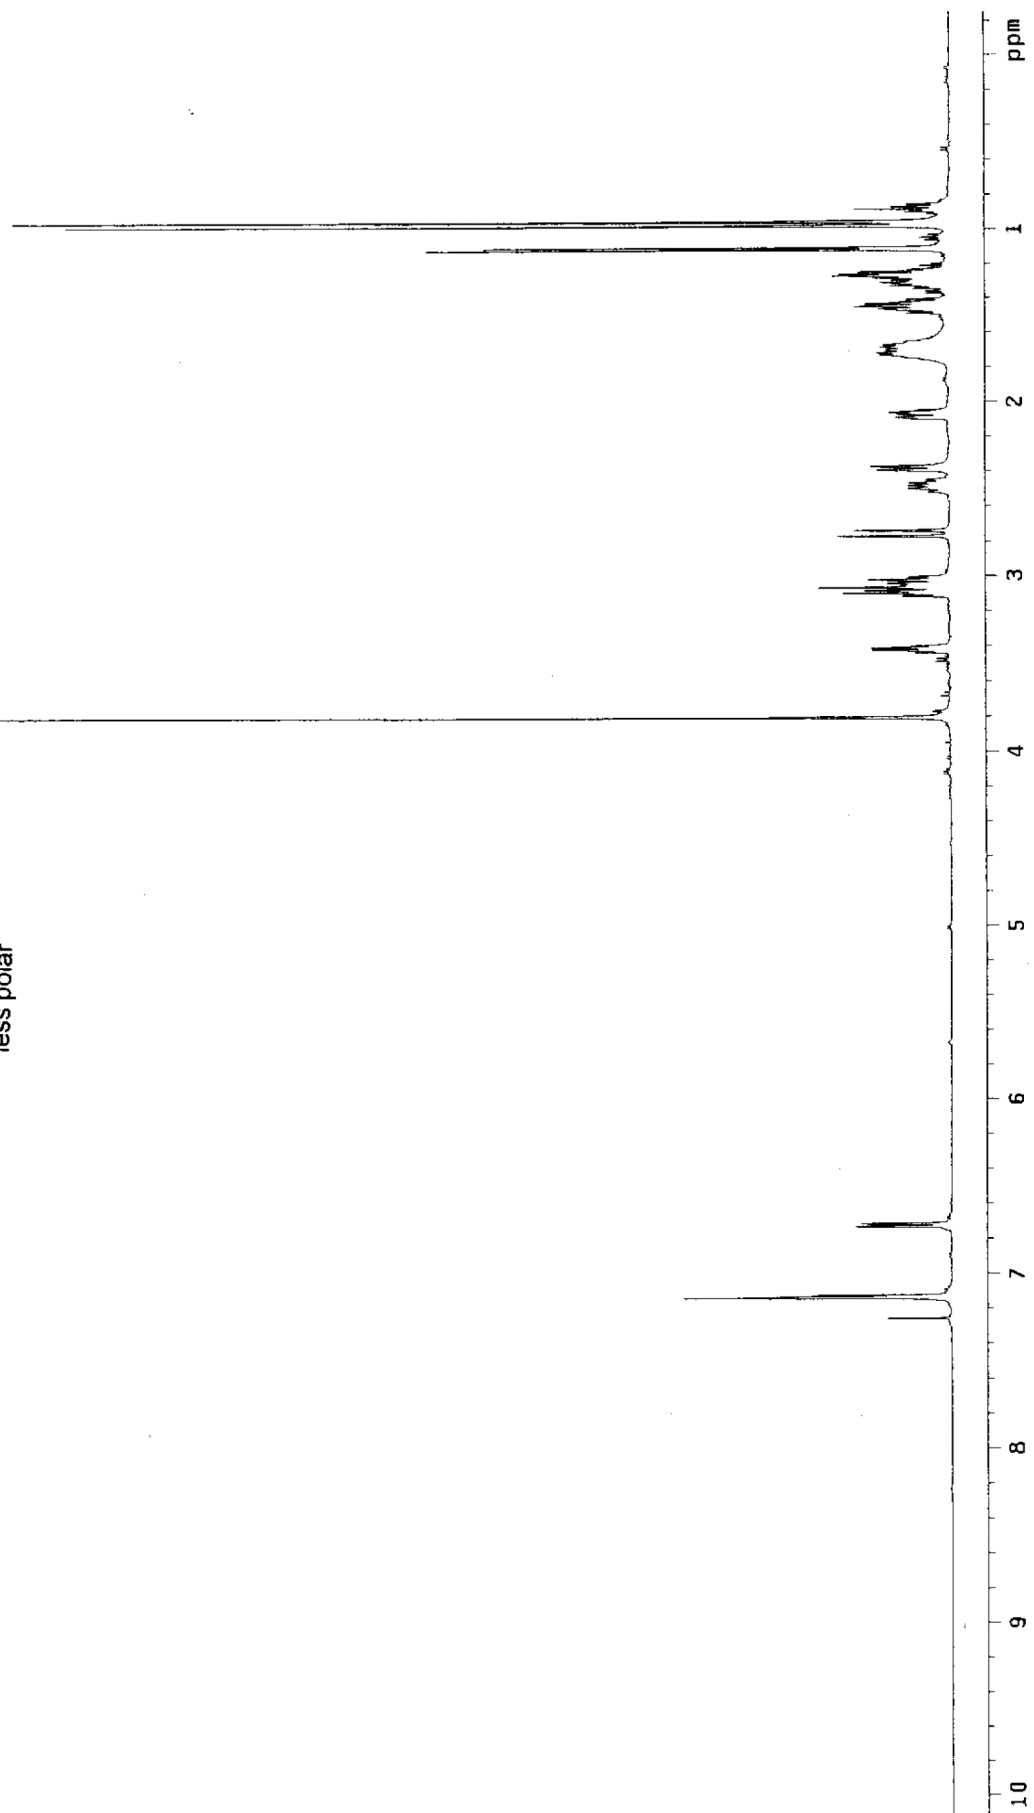

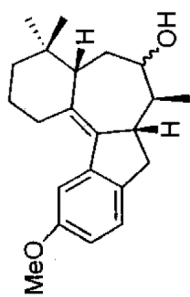

15

less polar

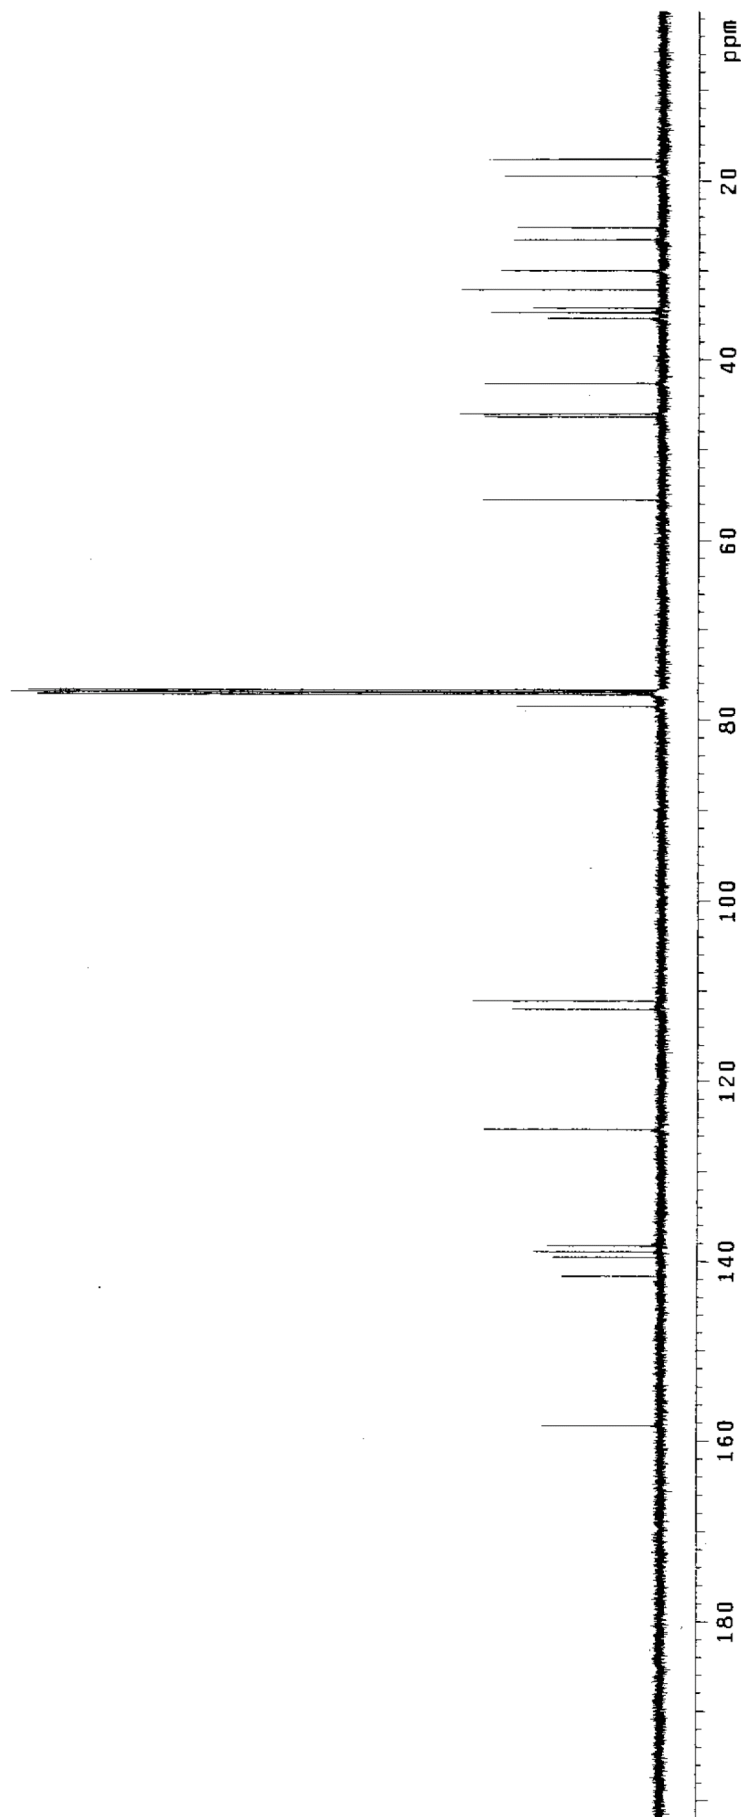

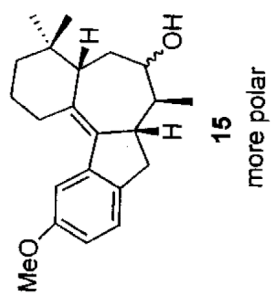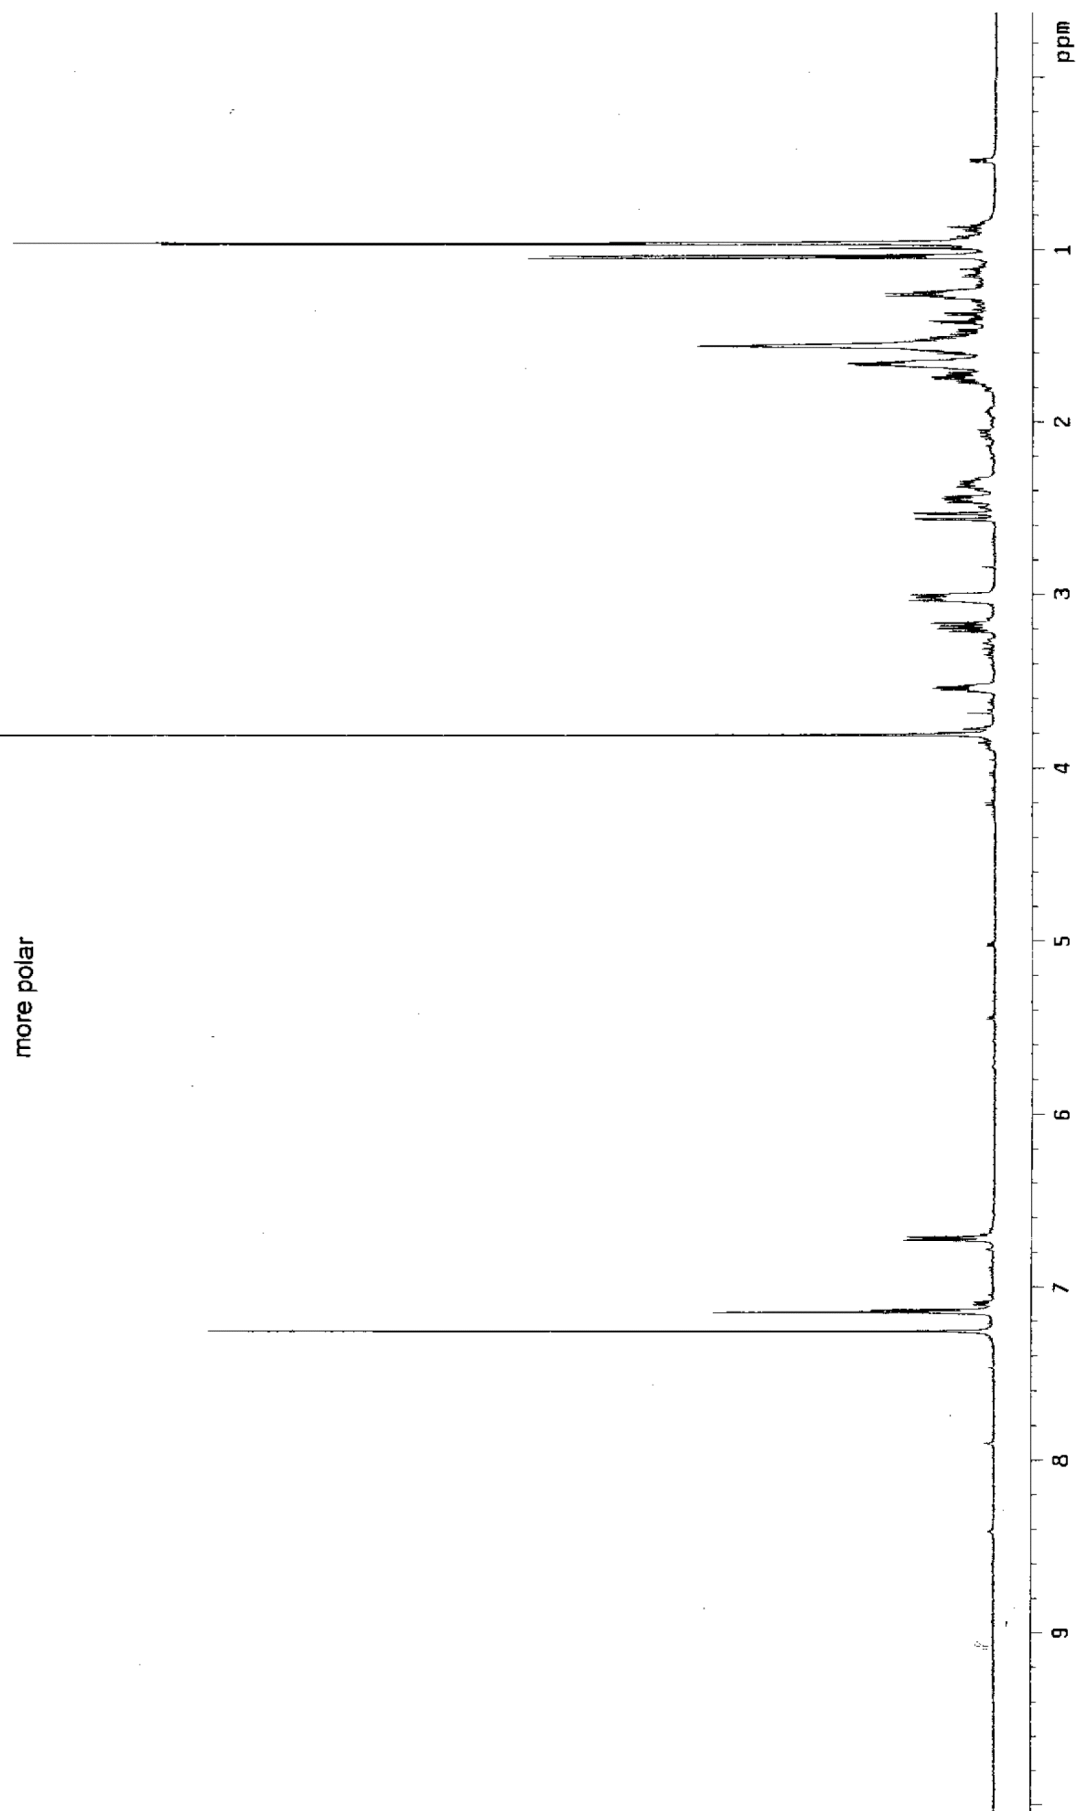

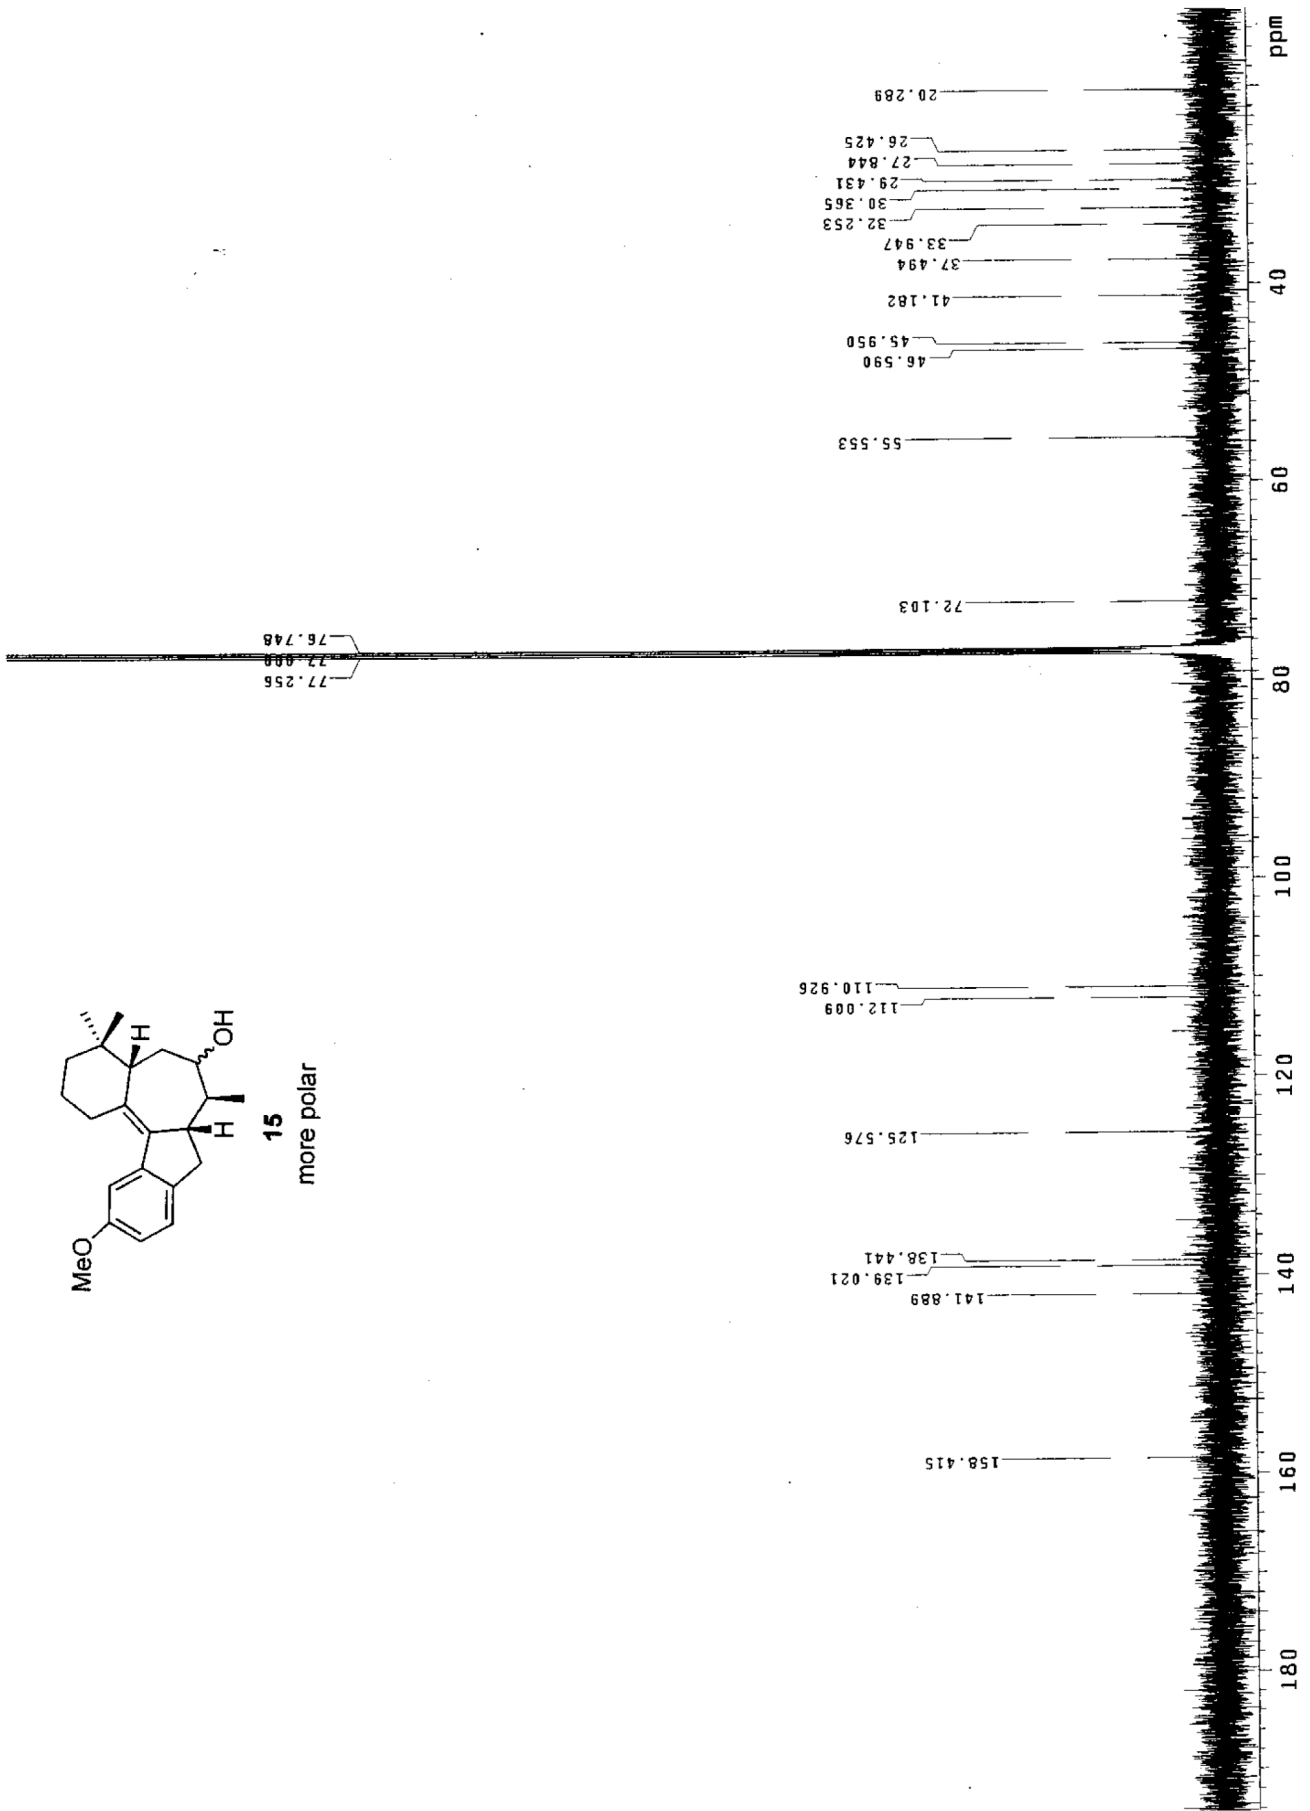

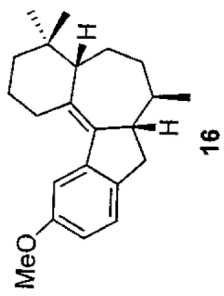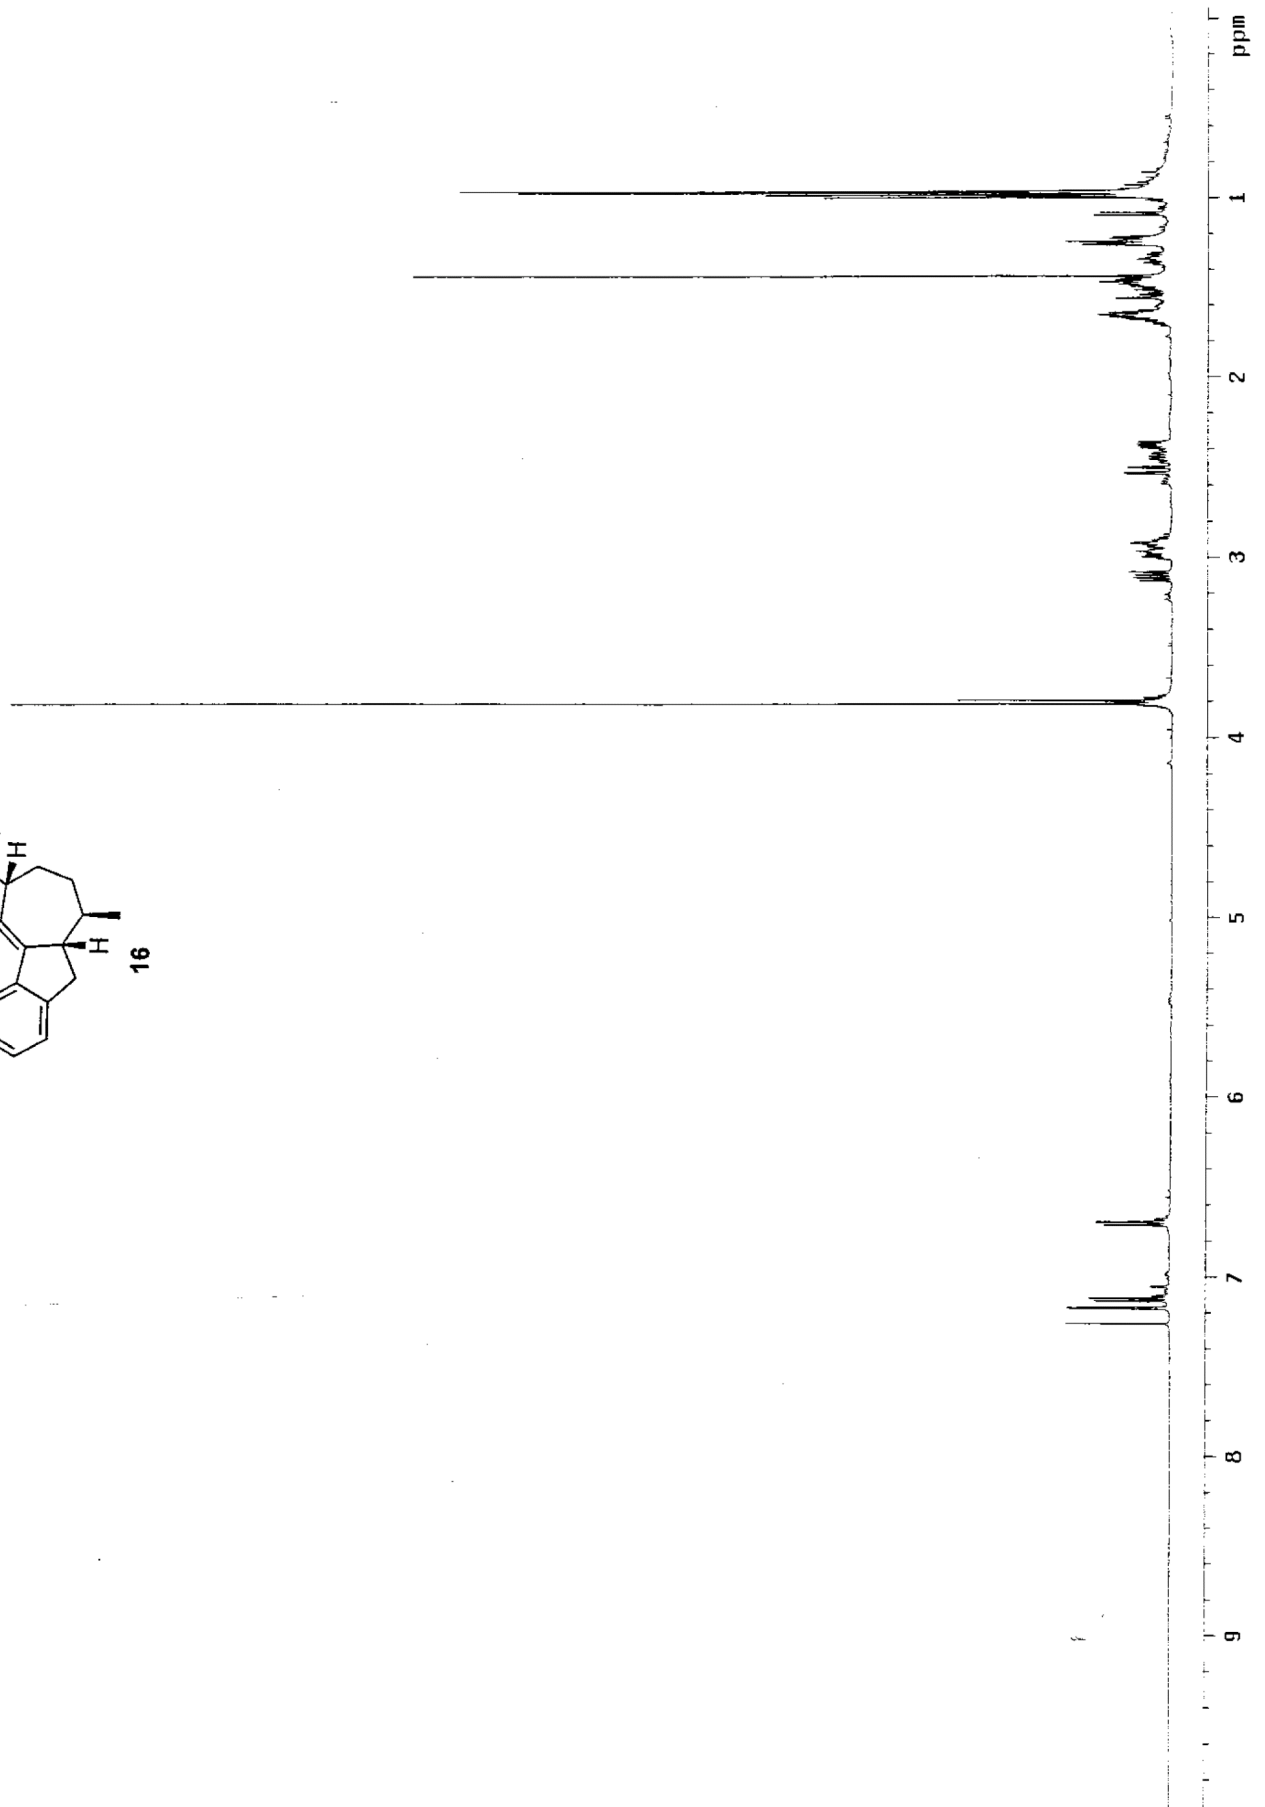



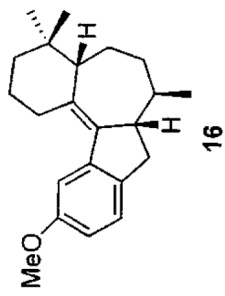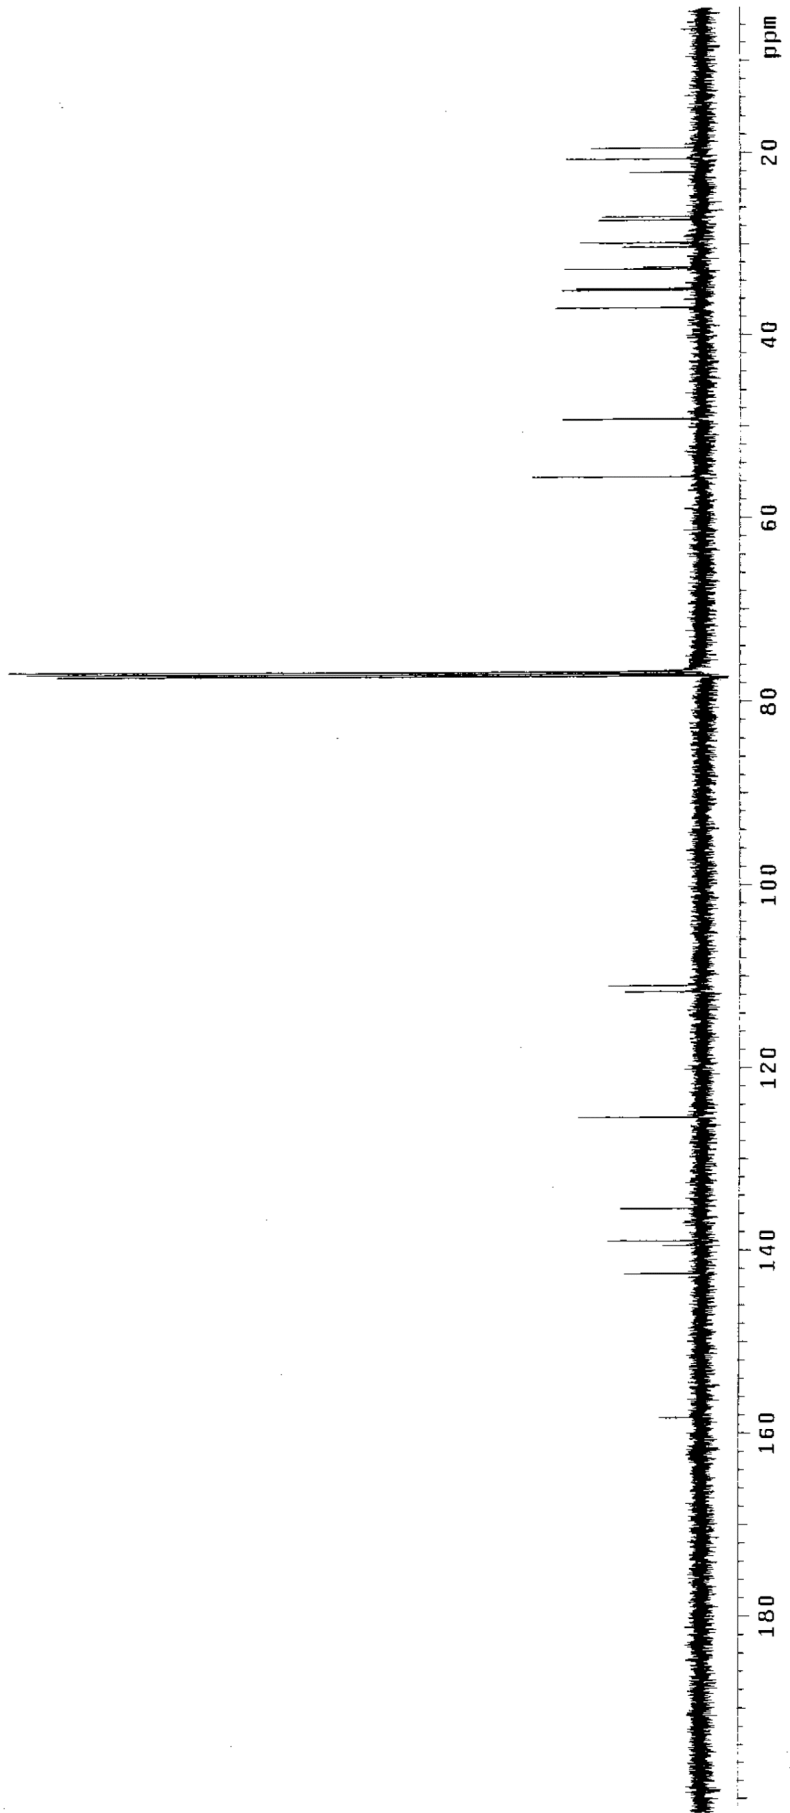

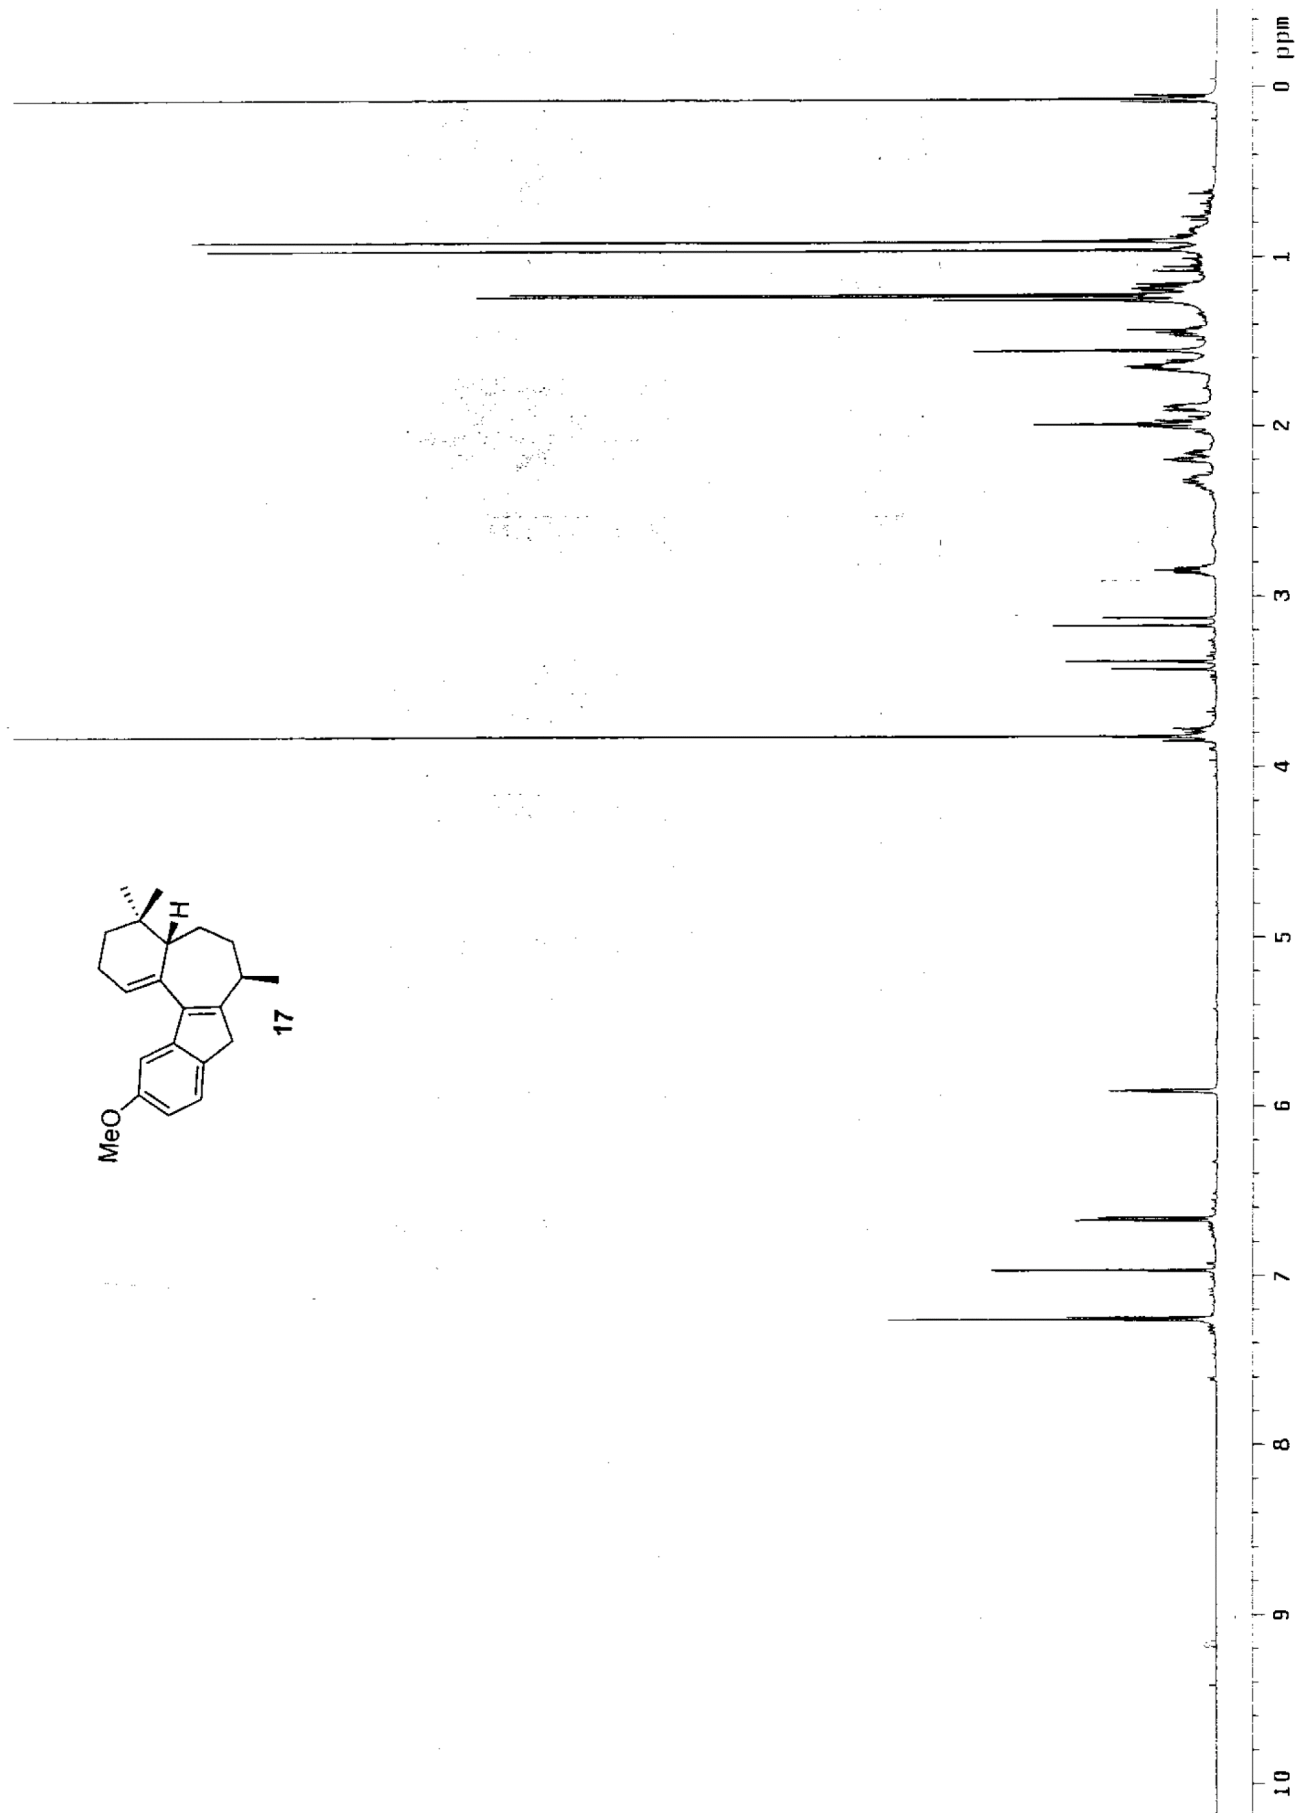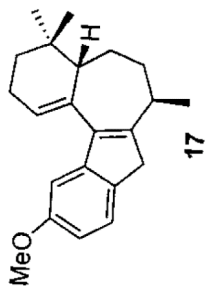

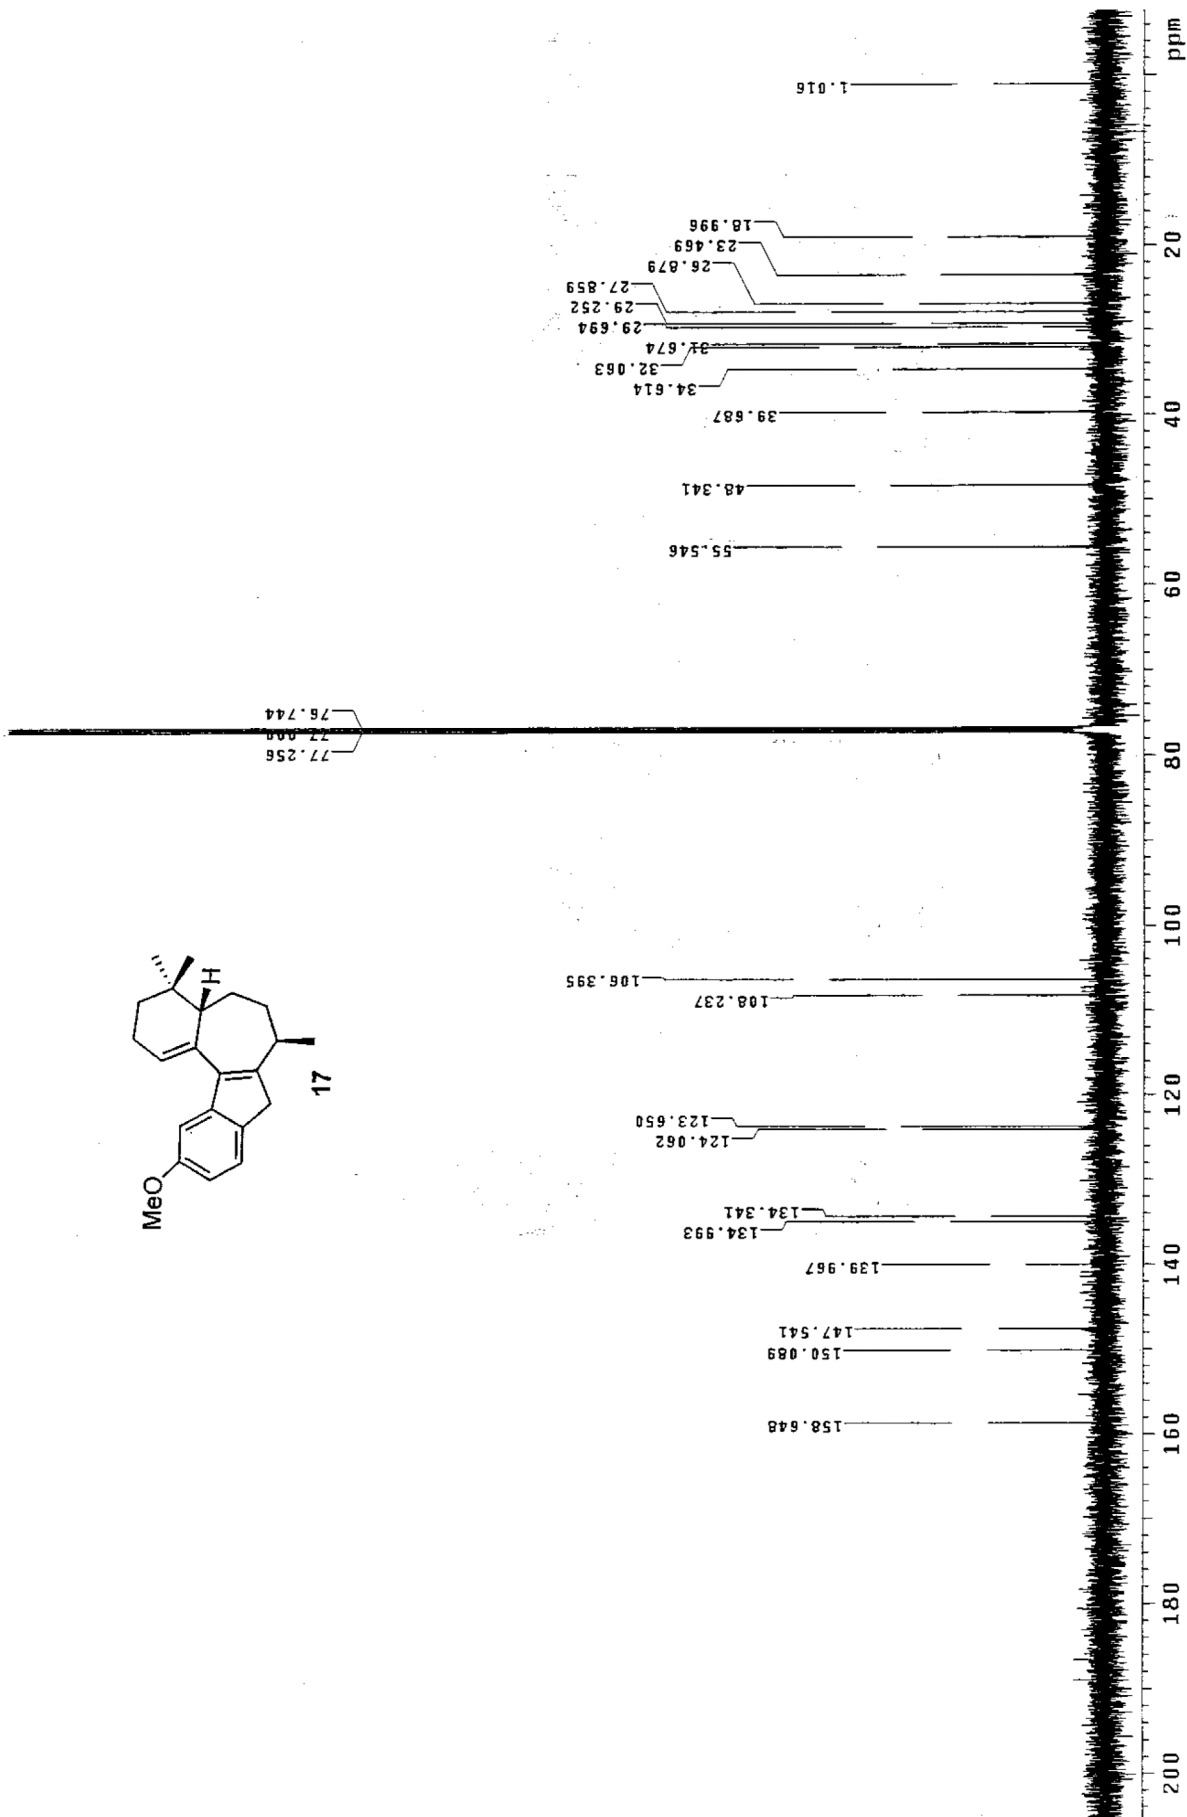

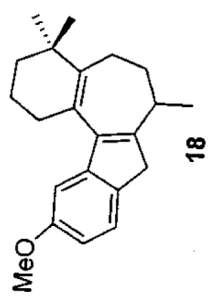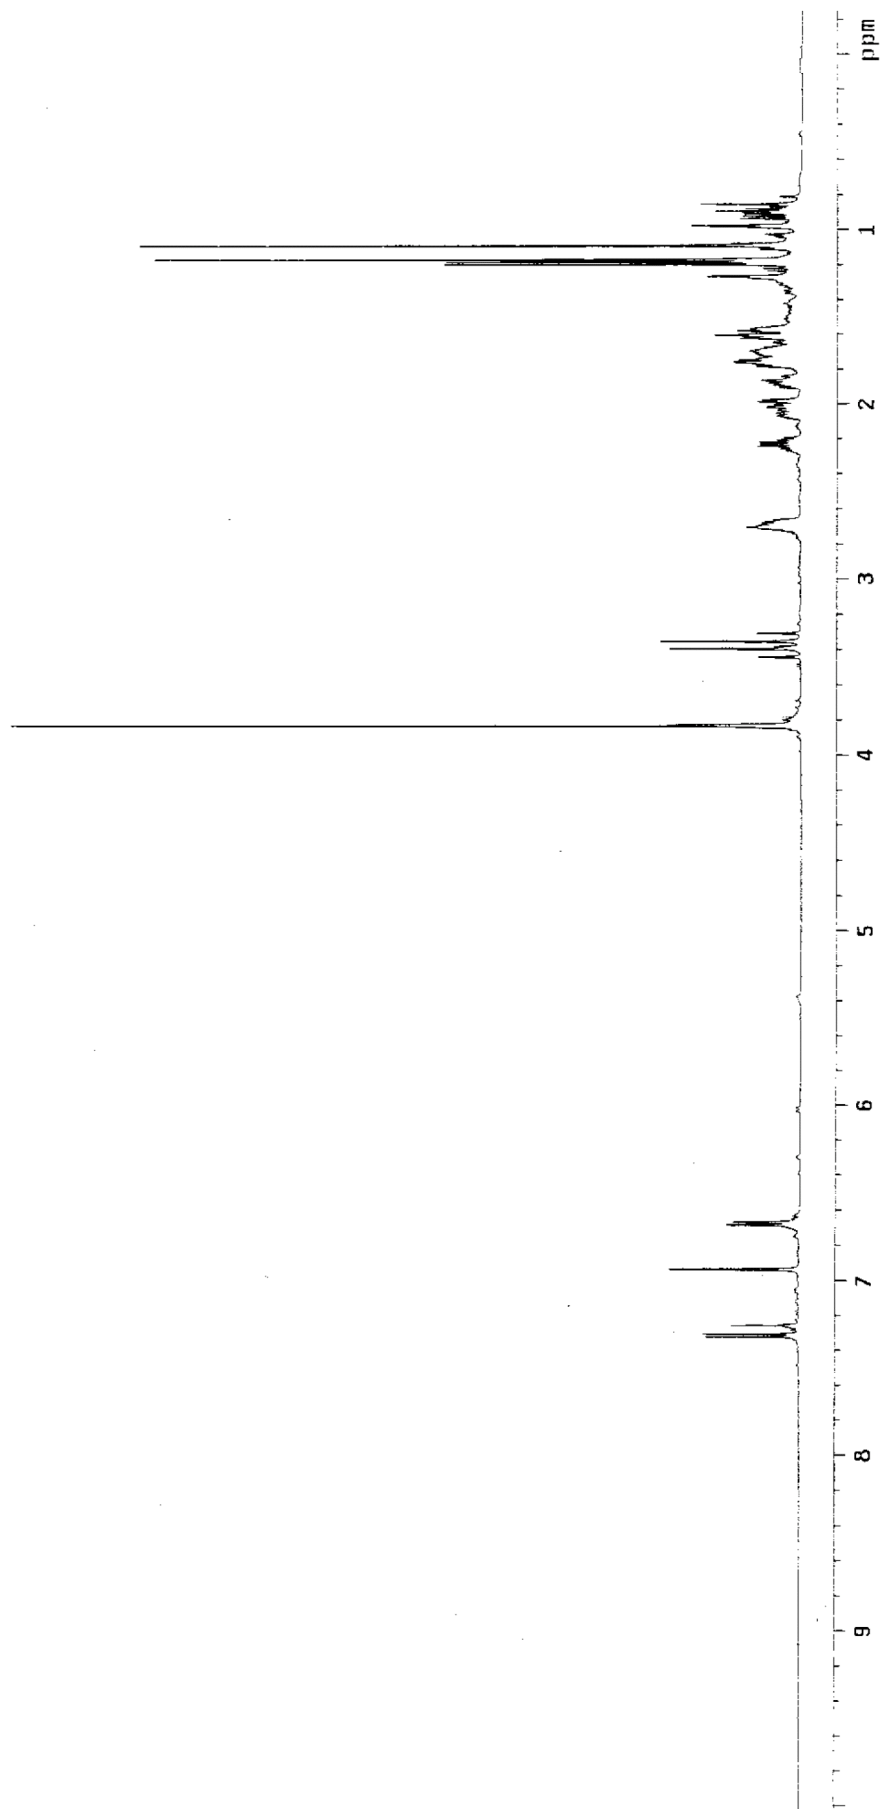

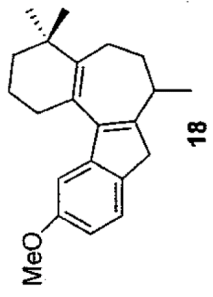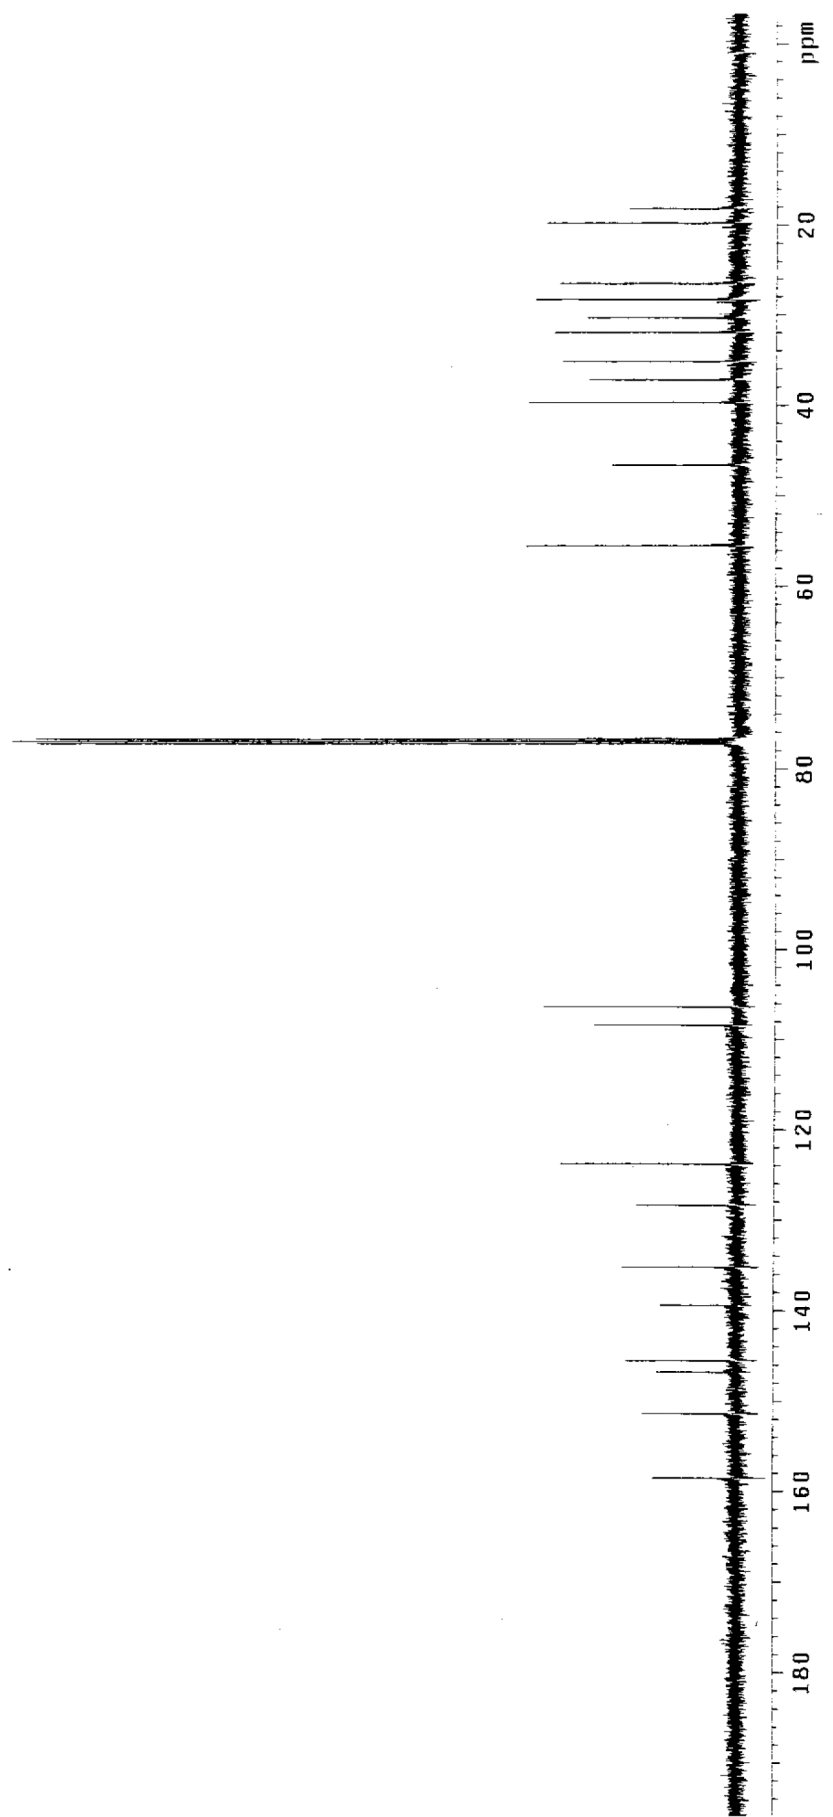

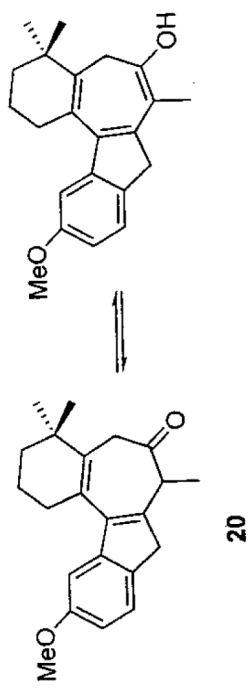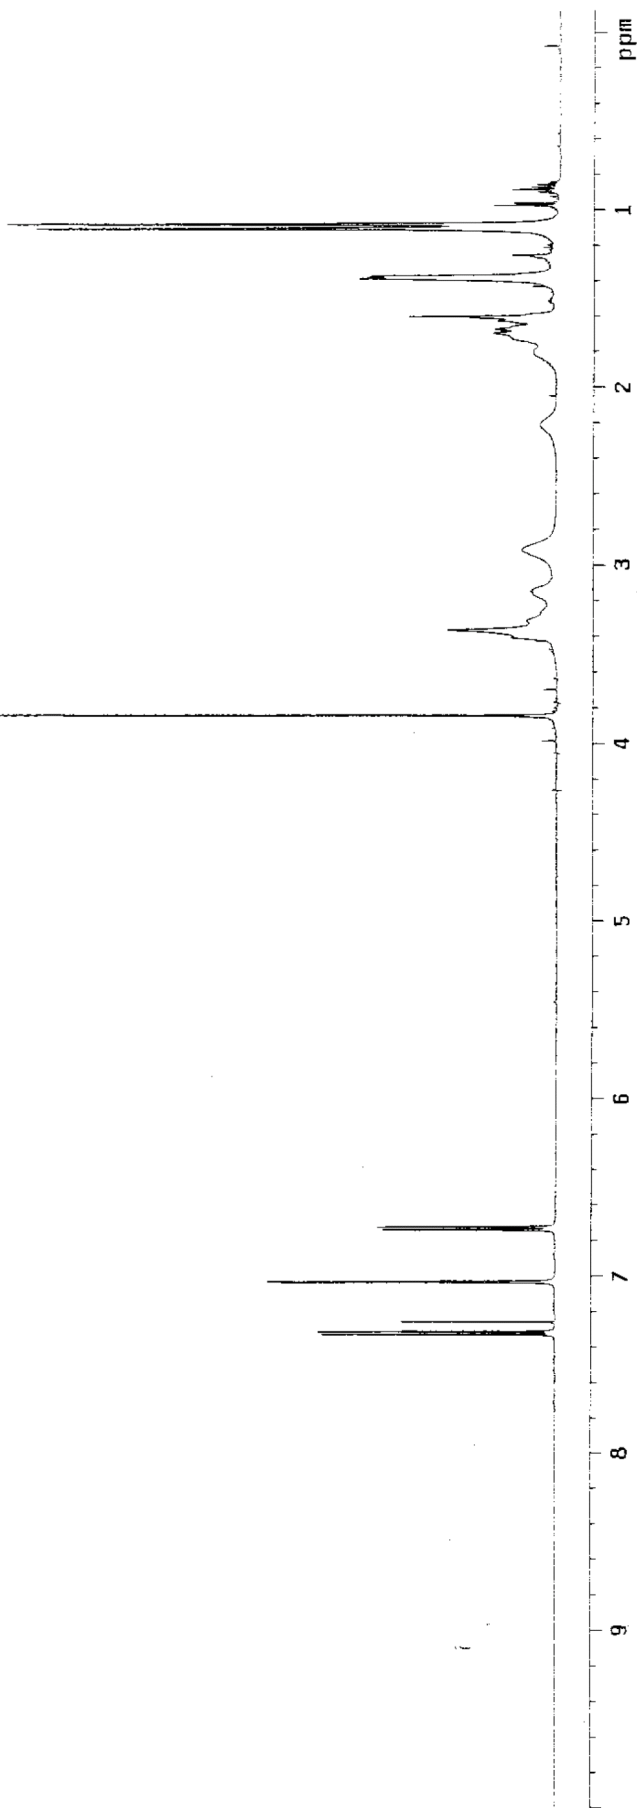

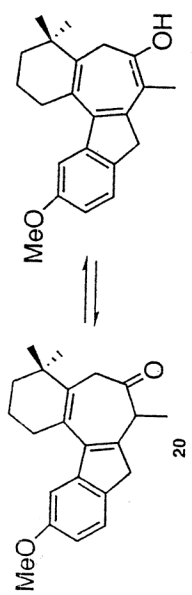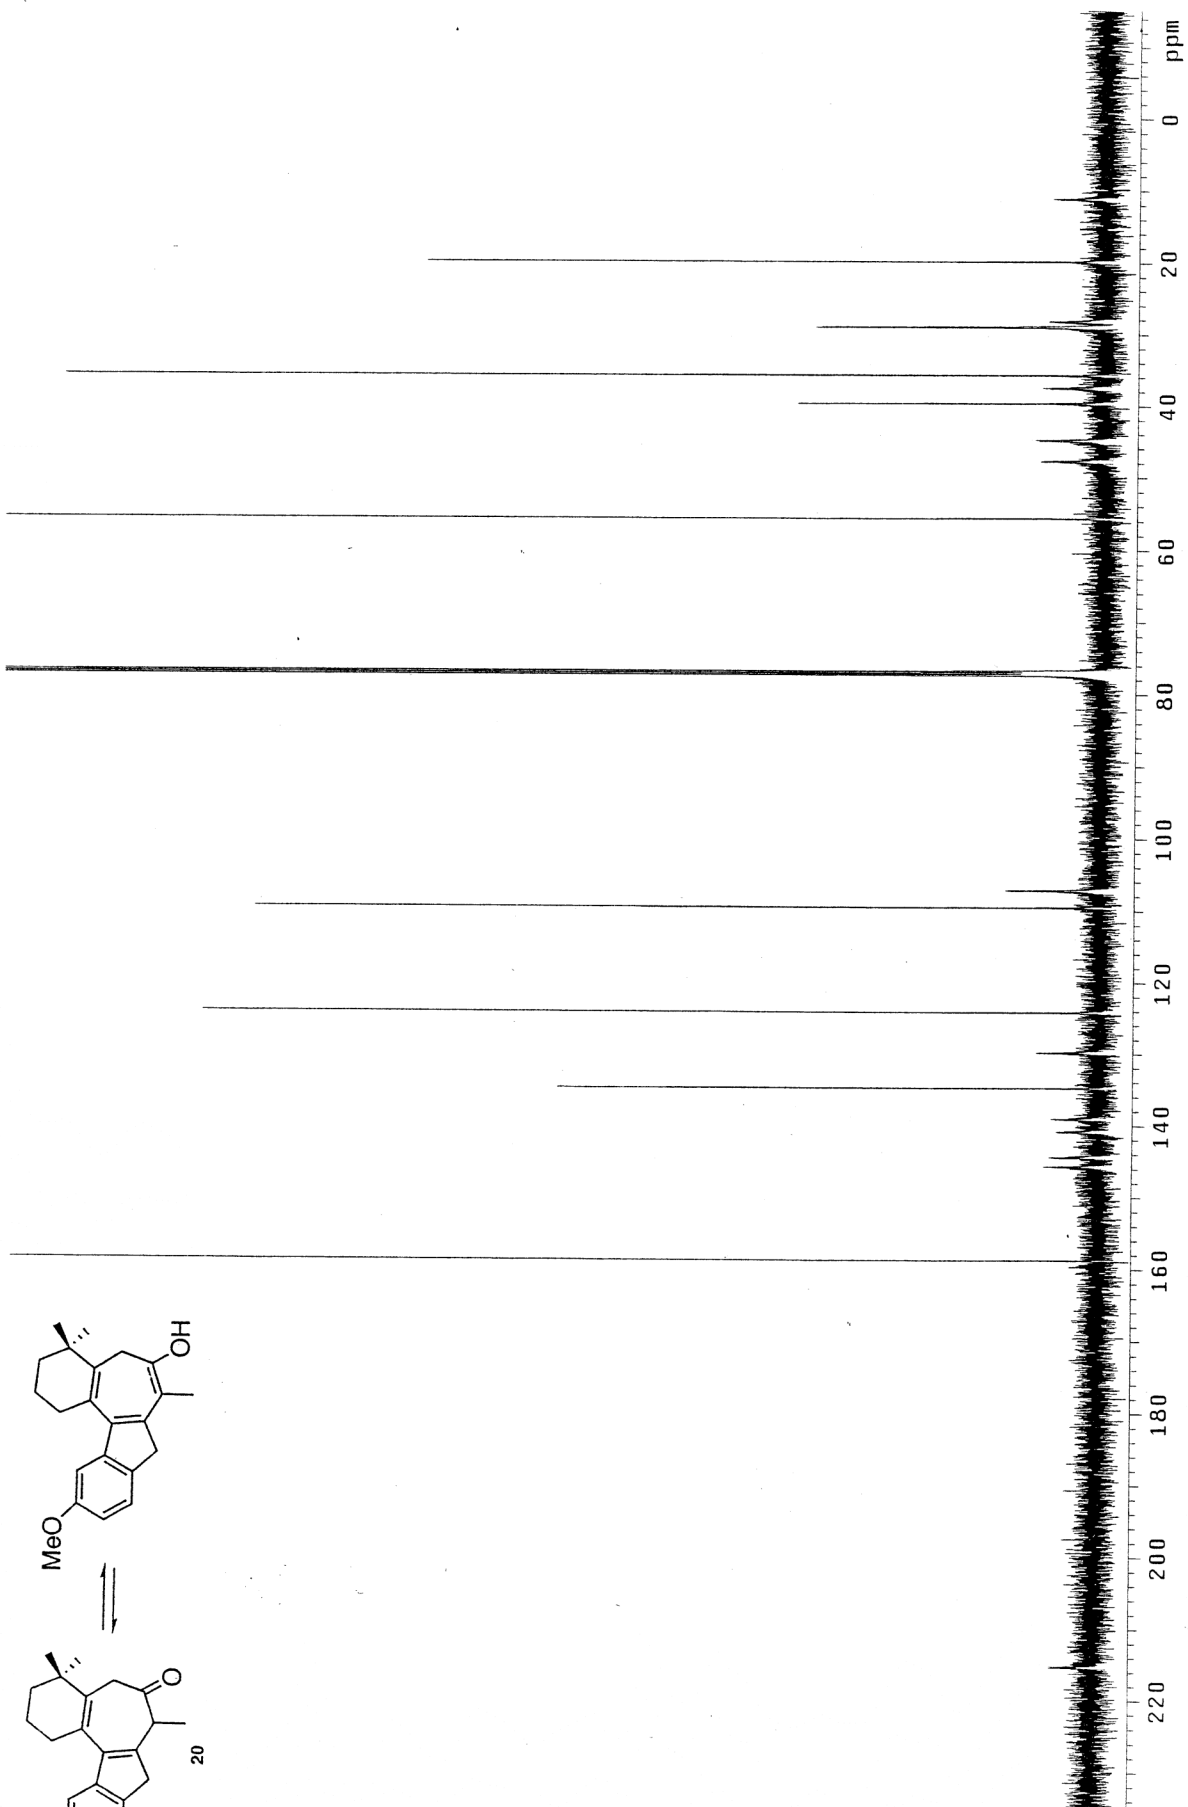

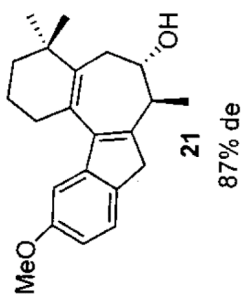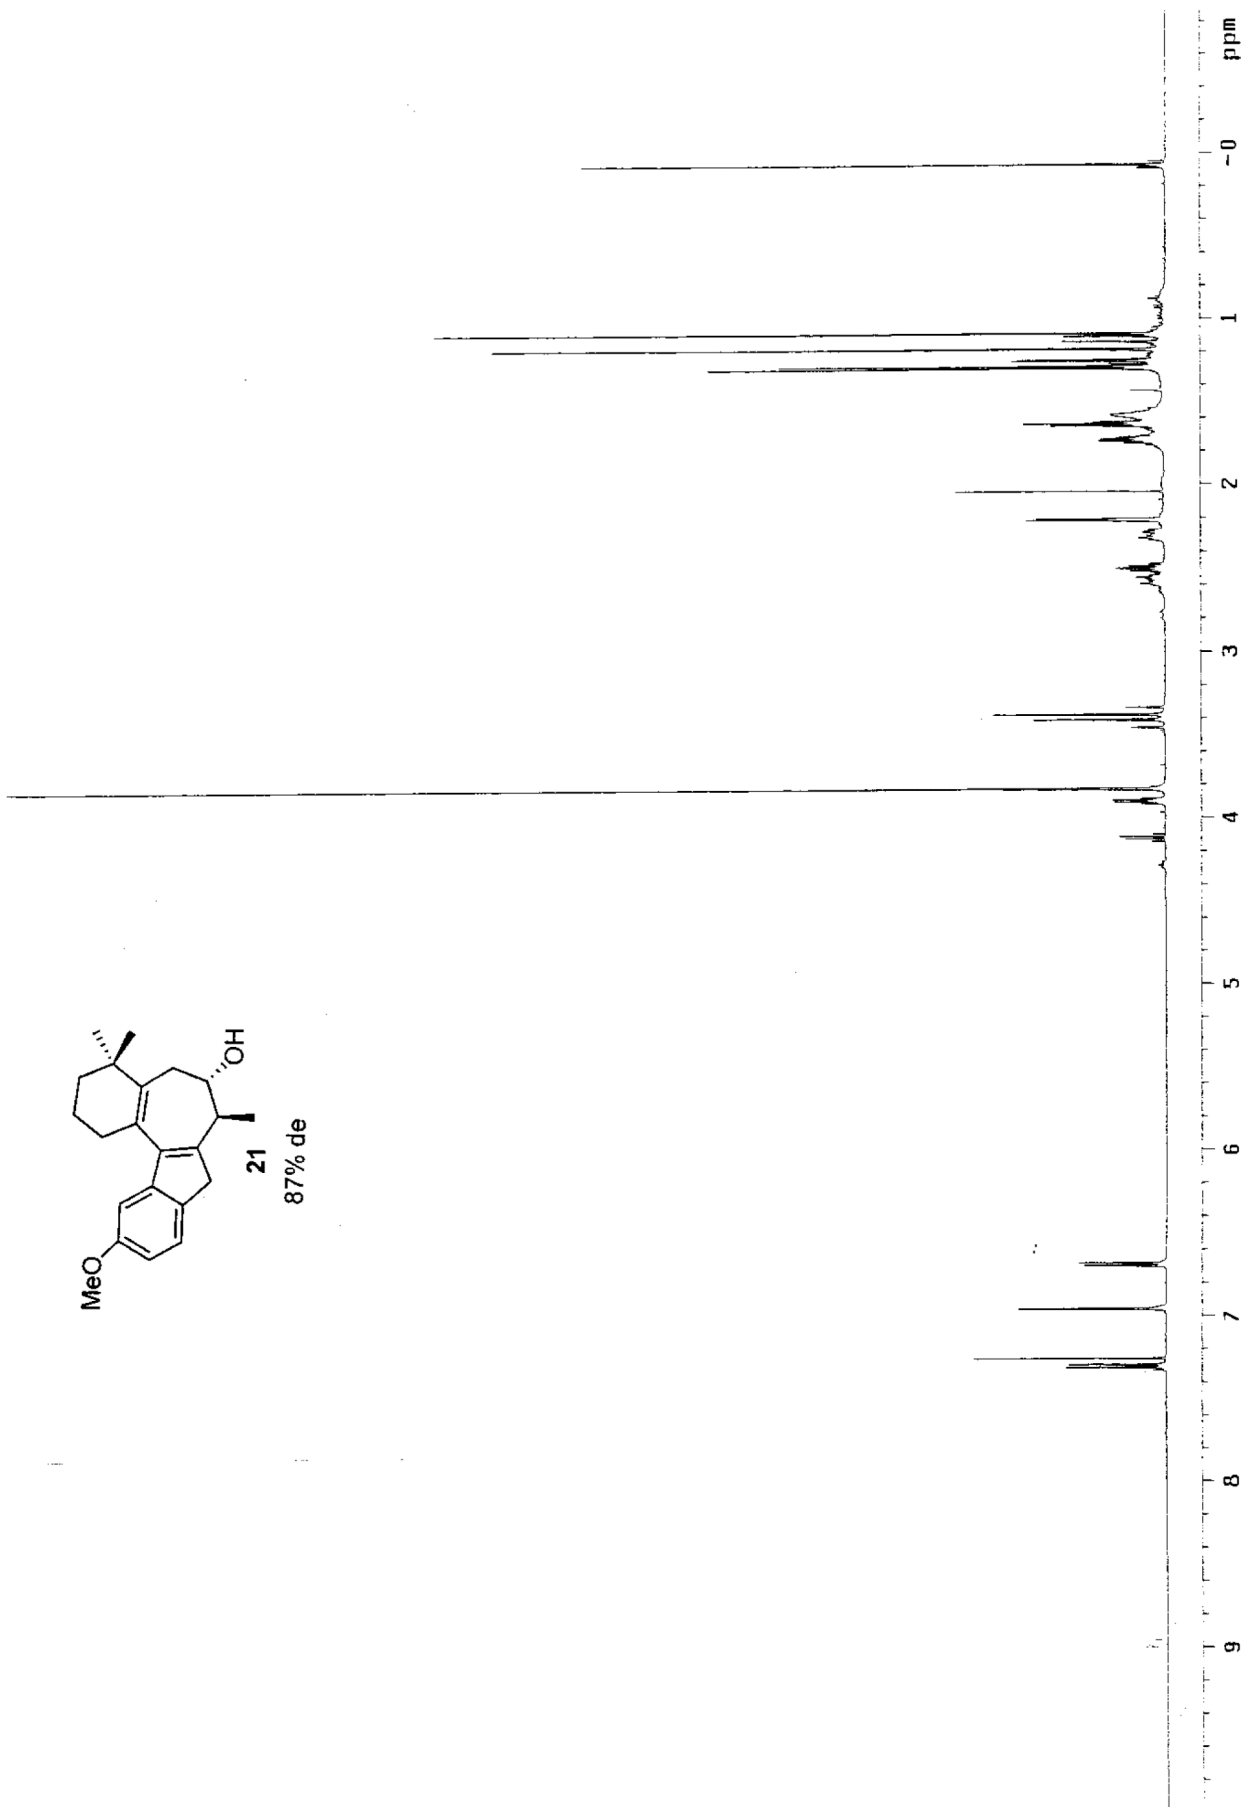



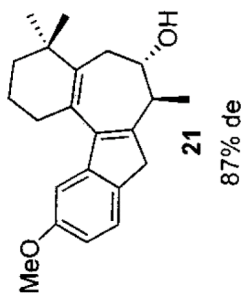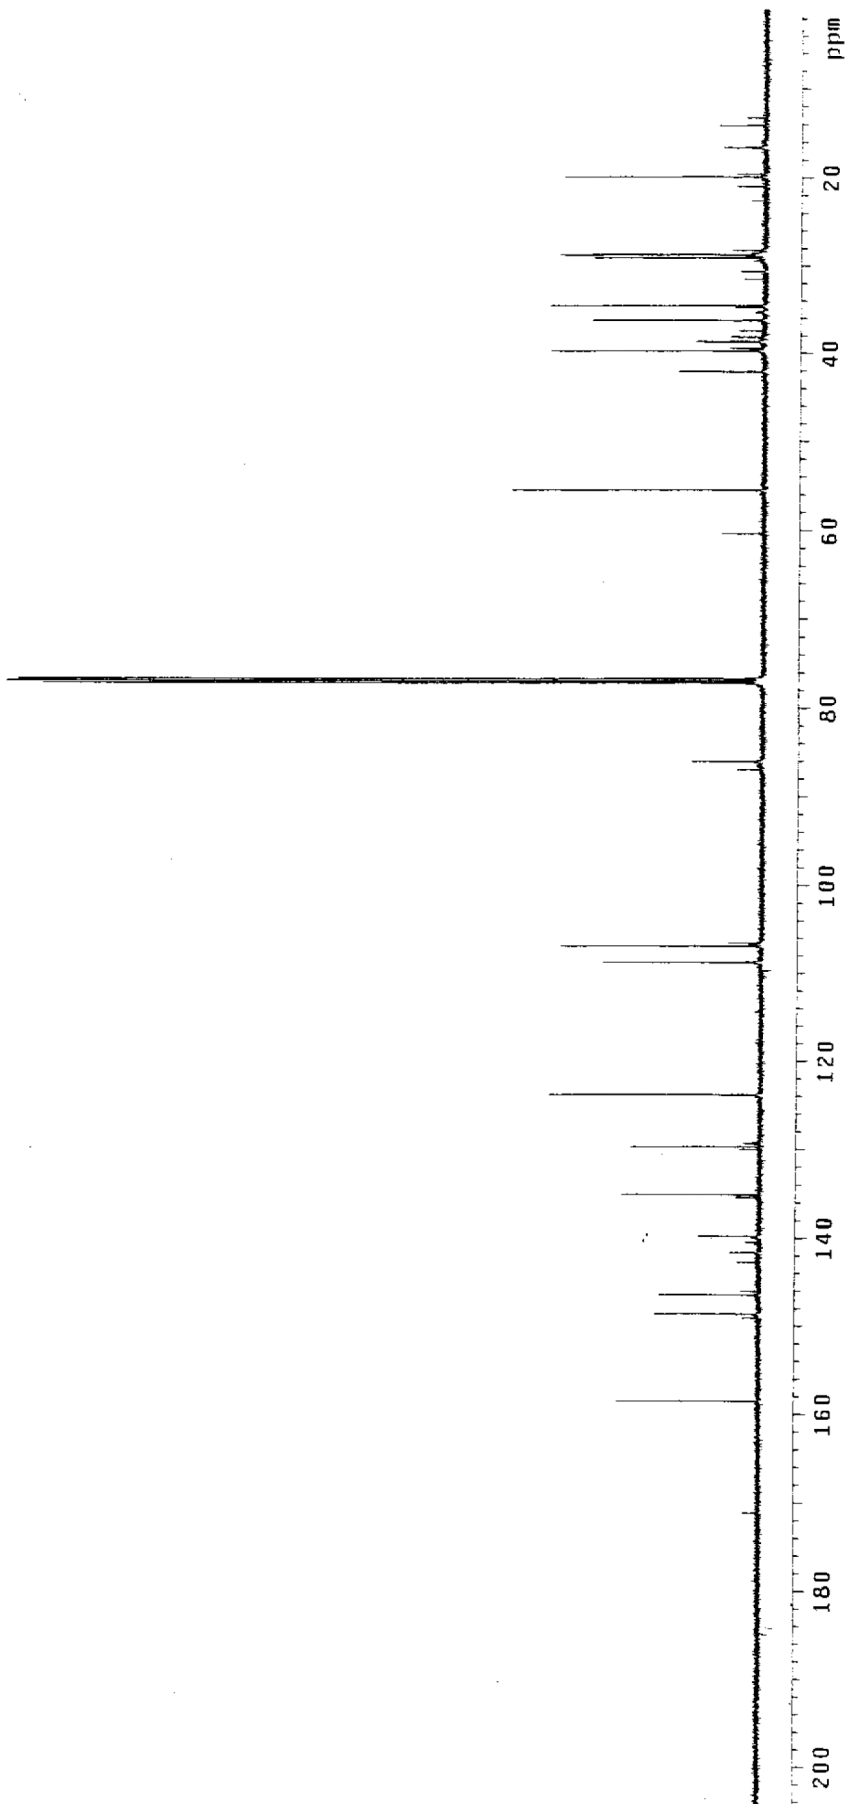

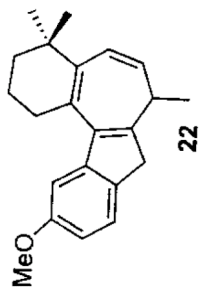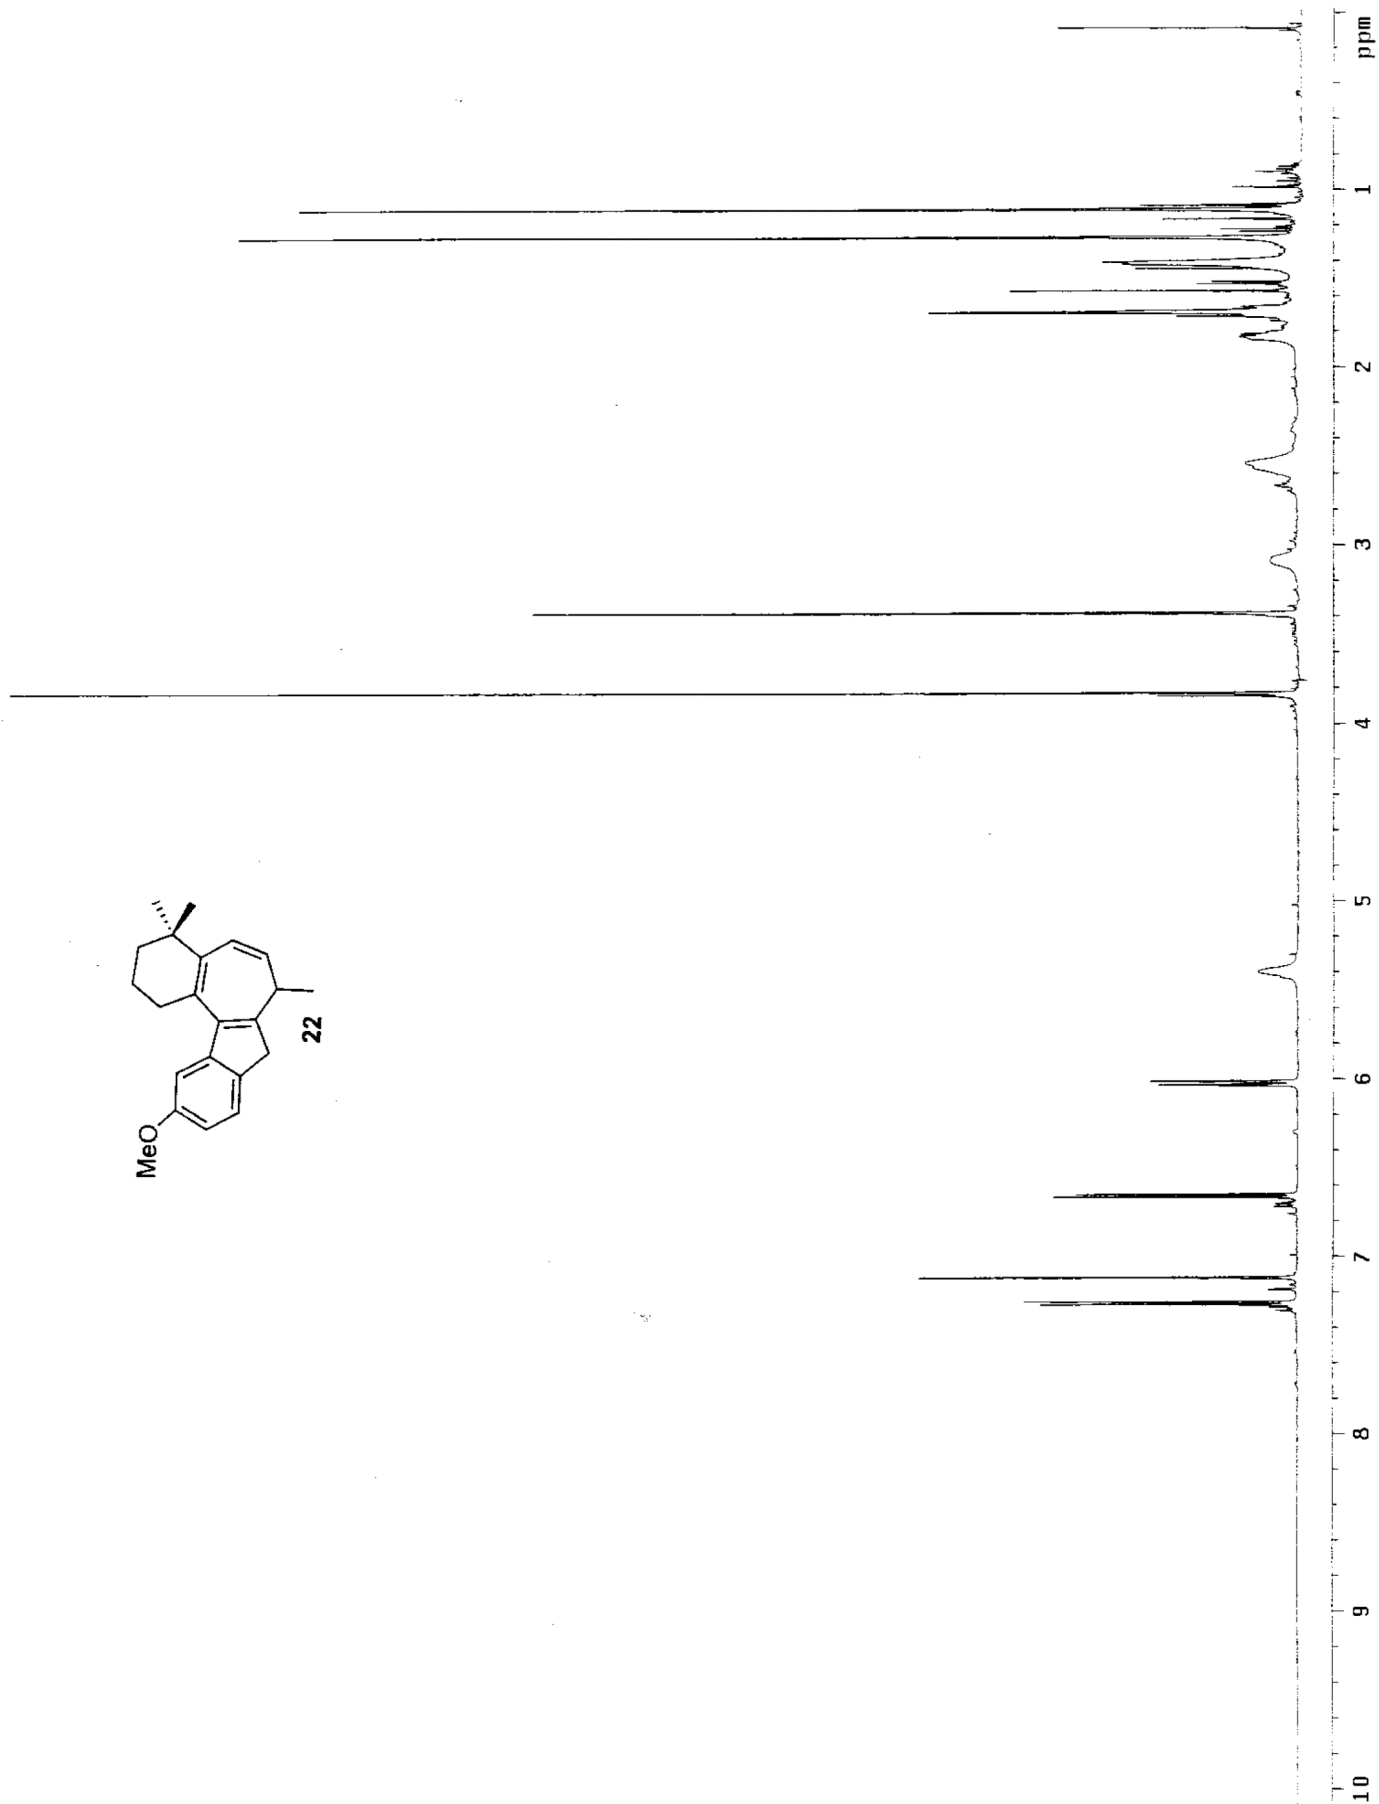

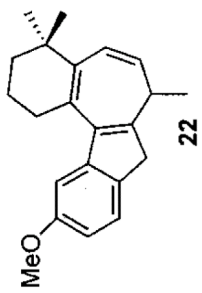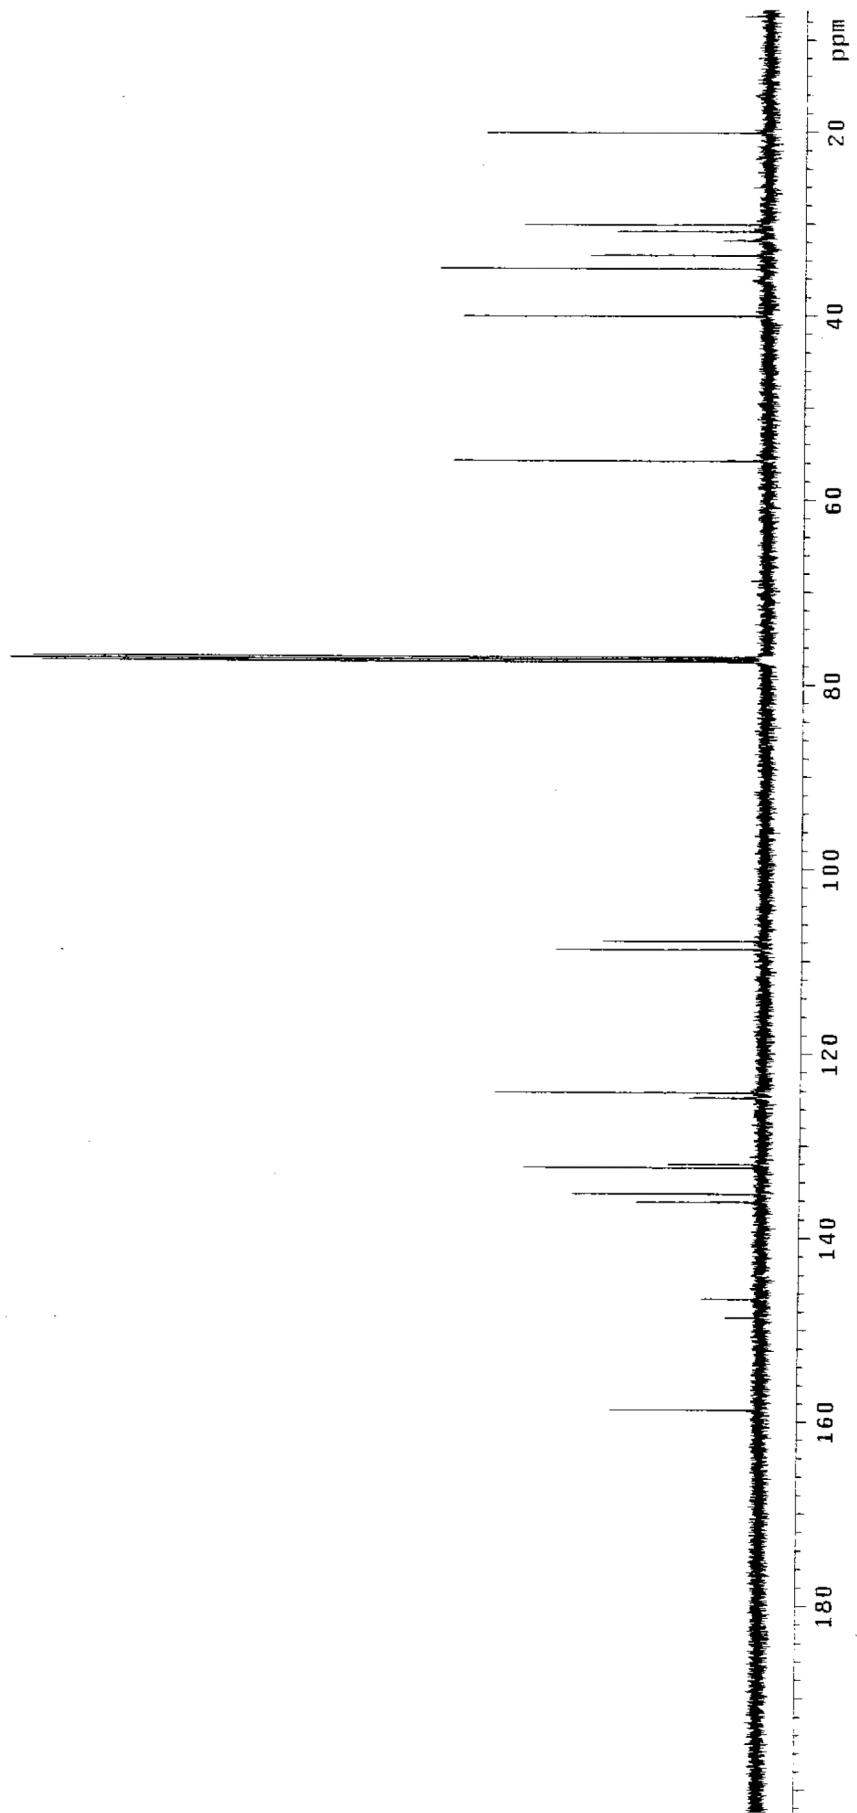

Supplement: NIHMS60480-supplement-2.pdf [file NIHMS60480-supplement-2.pdf]
